# Supplementary material
Source: PubMed Central journal article supplement (PMC6411385)
Supplement: NIHMS1006438-supplement-si.pdf [file NIHMS1006438-supplement-si.pdf]

# Supporting Information for: Chemometric Approaches for Developing Infrared Nanosensors to Image Anthracyclines

Jackson Travis Del Bonis-O'Donnell<sup>1</sup>, Rebecca L. Pinals<sup>1</sup>, Sanghwa Jeong<sup>1</sup>, Ami Thakrar<sup>1</sup>, Russ Wolfinger, Markita P. Landry\*<sup>1,4-6</sup>

<sup>1</sup> Department of Chemical and Biomolecular Engineering, University of California, Berkeley, CA 94720

<sup>2</sup> SAS Institute Inc. Cary, NC 27513

<sup>3</sup> Department of Statistics, North Carolina State University, Raleigh, NC 27695

<sup>4</sup> Innovative Genomics Institute (IGI), Berkeley, CA 94720

<sup>5</sup> California Institute for Quantitative Biosciences, QB3, University of California, Berkeley, CA 94720

<sup>6</sup> Chan-Zuckerberg Biohub, San Francisco, CA 94158

\*Corresponding author, e-mail: [landry@berkeley.edu](mailto:landry@berkeley.edu)

## SUPPLEMENTARY METHODS AND RESULTS

### ANALYSIS OF SIMULATED NANOSENSOR FLUORESCENCE DATA

Commonly used pairwise distance matrices are calculated using the following metrics: Euclidean, Cityblock, Chebyshev, Minkowski (order  $p=5$ ), cosine, correlation, Spearman, and cross correlation. Here, SWNT wavelengths and their corresponding intensities are treated as variables and values, respectively, while different analytes correspond to sample elements. We found that certain analytes were highlighted differently depending on the distance metric. We created a signal metric,  $s$ , by calculating the mean pairwise distance for each analyte,  $s_i$ , and normalizing by the mean signal for all analytes,  $\sum_i^N s_i/N$ . Of the nanosensor responses simulated, the response with a significant increase of fluorescence intensity (*Response 3*) yielded a large pairwise distance using the Minkowski metric family (Euclidean, Cityblock, and Chebyshev). Using the Chebyshev distance (Minkowski of order  $p=\infty$ ) as a signal metric, all responses, except for *Response 5*, produced a signal above a detection limit of  $3\sigma_{SD}$ , where the larger the fluorescence difference, the greater the distance metric value. Alternatively, using cosine, correlation, or Spearman distance for signal metrics, only *Response 2, 4, 6* and *8* were above the detection limit, with *Response 4* producing the largest signal. For these analyses, the magnitude of the fluorescence change dictated the strength of the calculated signal response. *Response 5*, which experiences a modest solvatochromic shift, failed to produce a signal above noise using any of the above distance

metrics. Solvatochromic shifts are often preferred signals for use in complex biological media, since the wavelength shift readout can be more selective than a fluorescence intensity modulation. To overcome this limitation of identifying solvatochromic signals, we constructed a metric sensitive to wavelength shifts by calculating pairwise cross correlations between spectra in a shifting reference frame (XCorr) to determine the wavelength offset. Using this metric, we obtained signals above noise for *Response 4* and *Response 5*, the only two simulated signals which corresponded to solvatochromic fluorescence shifts. Thus, results from our simulated nanosensor response libraries suggest that proper selection of a pairwise metric can be employed to readily screen for and quantify modulations in complex fluorescence emission spectra.

## SUPPORTING FIGURES

**Figure S1.** Results from the analysis of screening data from each candidate SWNT nanosensor. (Left) Emission spectra heatmaps collected from chemical screens of SWNT nanosensor candidates against a panel of analytes. Each analyte-nanosensor sample was prepared in at least triplicate. Analytes/samples names for each screen are provided in torder from top to bottom in the file supporting information file "SI\_File2\_sample-IDs.xlsx". (Center) Pair-wise distance matrices calculated from the fluorescence emission spectra of each analyte sample using different metrics. (Right) Signal response,  $s_i$ , calculated for each analyte sample using the corresponding distance metric shown in the pair-wise distance plots. (Bottom) List of all analyte "hits" with signal responses,  $s_i$ , above noise. Hits were pooled across all distance metrics calculations.

### Corona: DNA (TTA)<sub>4</sub>TT

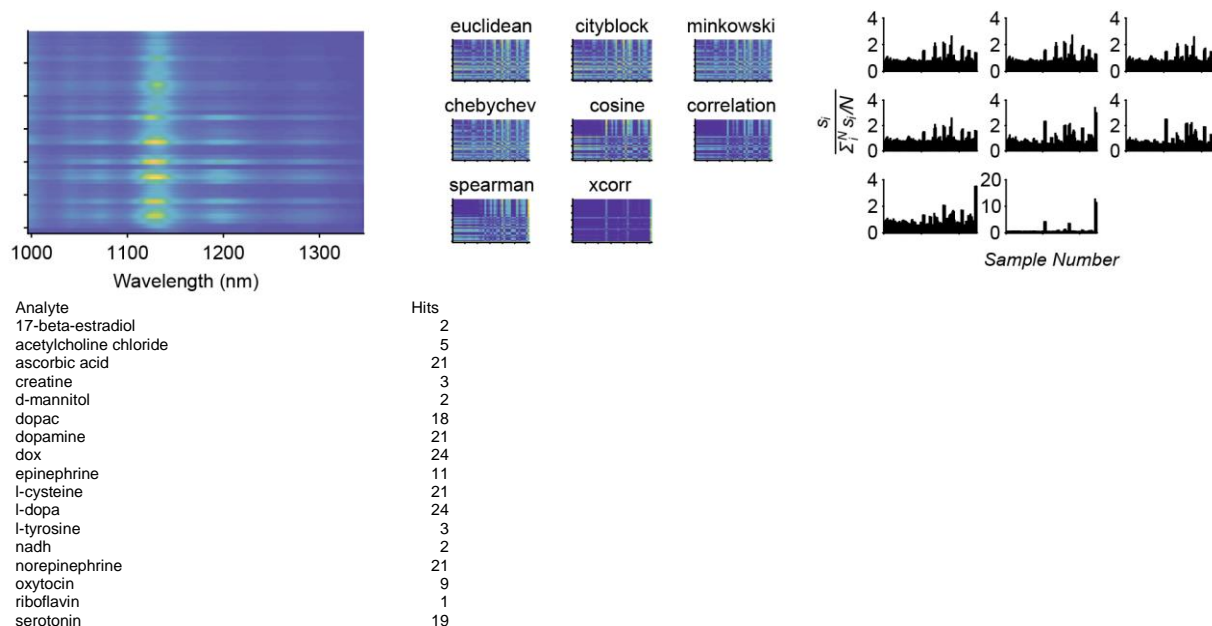

### Corona: DNA (TAT)<sub>4</sub>

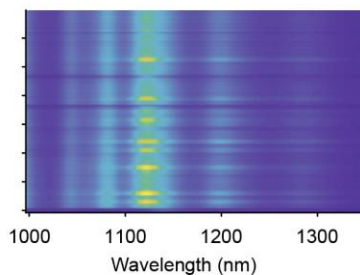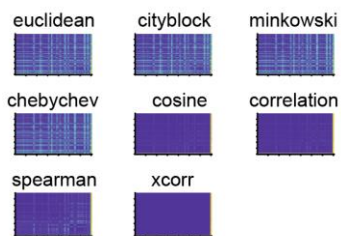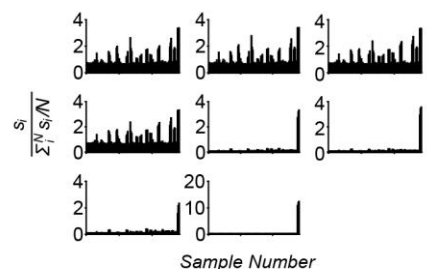

| Analyte        | Hits |
|----------------|------|
| amp            | 2    |
| ascorbic acid  | 15   |
| aspartic acid  | 1    |
| control        | 1    |
| cysteine       | 12   |
| cytidine       | 4    |
| dopamine       | 27   |
| dox            | 24   |
| epinephrine    | 12   |
| guanosine      | 12   |
| l-dopa         | 14   |
| l-thyroxine    | 12   |
| norepinephrine | 11   |
| riboflavin     | 8    |
| serotonin      | 6    |

### Corona: RITC-PEG-RITC

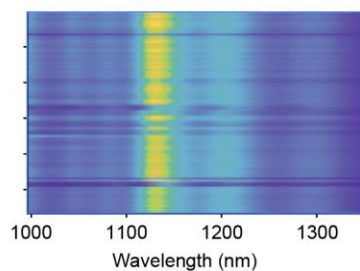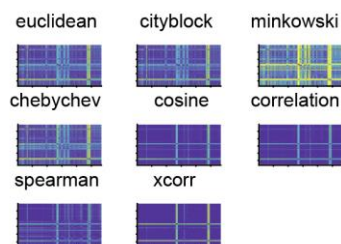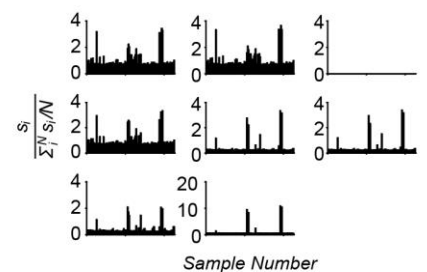

| Analyte         | Hits |
|-----------------|------|
| adenosine       | 2    |
| ampicillin      | 6    |
| camp            | 6    |
| d-aspartic acid | 3    |
| d-mannose       | 3    |
| dox             | 21   |
| epinephrine     | 2    |
| estradiol       | 10   |
| norepinephrine  | 2    |
| oxytocin        | 8    |
| riboflavin      | 7    |
| serotonin       | 6    |
| thyroxine       | 21   |
| tyrosine        | 8    |

### Corona: DNA (GT)<sub>15</sub>

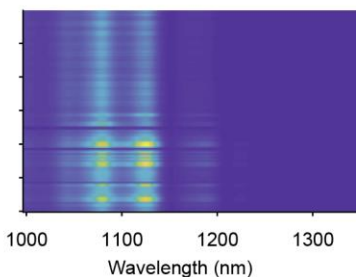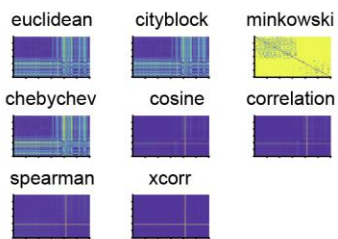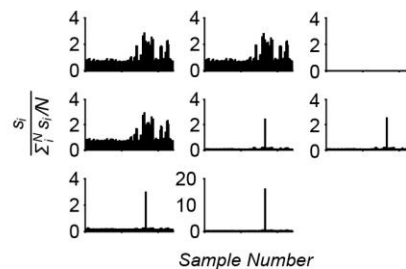

| Analyte        | Hits |
|----------------|------|
| ampicillin     | 8    |
| ascorbic acid  | 15   |
| creatine       | 7    |
| dopac          | 6    |
| dopamine       | 3    |
| epinephrine    | 15   |
| L-cysteine     | 9    |
| nadh           | 6    |
| norepinephrine | 9    |
| riboflavin     | 6    |
| serotonin      | 9    |

### Corona: DNA GTAGTCGAGTGTGTGTGTGTGT

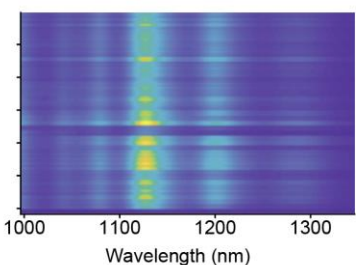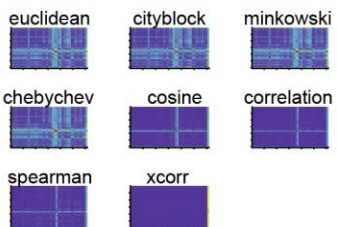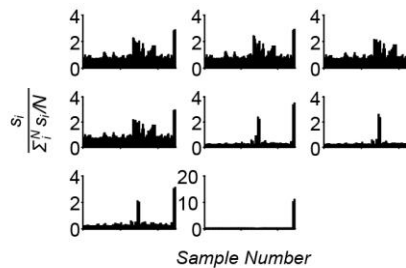

| Analyte           | Hits |
|-------------------|------|
| 17-beta-estradiol | 21   |
| ampicillin        | 3    |
| ascorbic acid     | 12   |
| D-glucose         | 6    |
| dopac             | 4    |
| dopamine          | 7    |
| dox               | 24   |
| epinephrine       | 10   |
| glutamic acid     | 10   |
| guanosine         | 4    |
| melatonin         | 2    |
| riboflavin        | 16   |
| serotonin         | 12   |

## Corona: Phospholipid DTTE-PEG2k

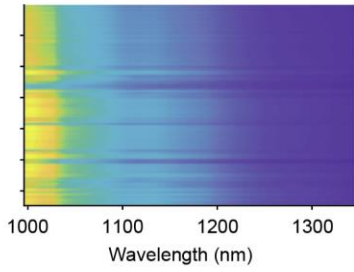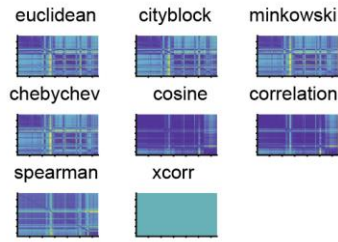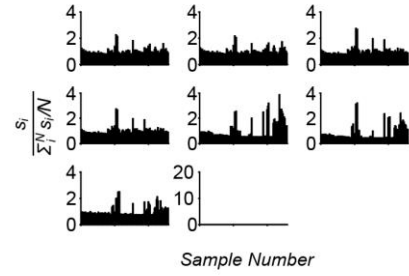

| Analyte           | Hits |
|-------------------|------|
| 2,4 dinitrophenol | 4    |
| acetylcholine     | 2    |
| control           | 15   |
| dopac             | 3    |
| dox               | 21   |
| epinephrine       | 7    |
| estradiol         | 9    |
| glutamic acid     | 10   |
| glycine           | 3    |
| l-dopa            | 8    |
| melatonin         | 36   |
| norepinephrine    | 7    |
| oxytocin          | 8    |
| riboflavin        | 17   |
| serotonin         | 15   |
| thyroxine         | 27   |
| tyrosine          | 15   |

## Corona: DNA (CCA)<sub>10</sub>

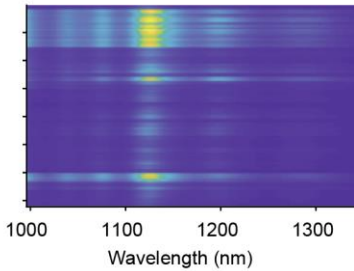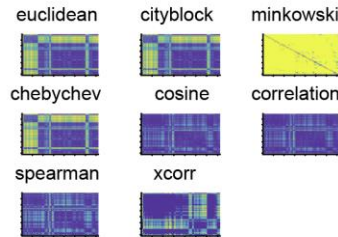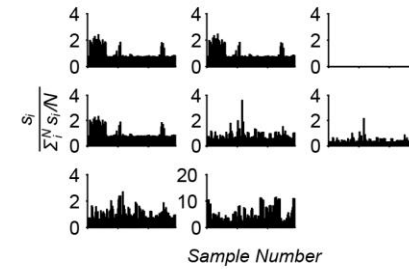

| Analyte           | Hits |
|-------------------|------|
| 17-beta-estradiol | 2    |
| adenosine         | 6    |
| ascorbic acid     | 4    |
| atp               | 2    |
| camp              | 5    |
| creatine          | 9    |
| cytidine          | 2    |
| d-fructose        | 2    |
| d-galactose       | 2    |
| d-mannitol        | 4    |
| dopamine          | 12   |
| epinephrine       | 14   |
| gaba              | 7    |
| glutamic acid     | 4    |
| glycine           | 4    |
| guanosine         | 9    |
| homovanillic acid | 10   |
| l-citrulline      | 6    |
| l-cysteine        | 6    |
| l-dopa            | 15   |
| l-thyroxine       | 8    |
| melatonin         | 4    |
| norepinephrine    | 12   |
| oxytocin          | 12   |
| riboflavin        | 17   |
| serotonin         | 1    |

urea 3  
**Corona: DNA CB14 (CCCCCCCACCGGCGTTTCCCCCCC)**

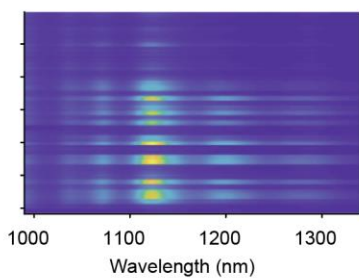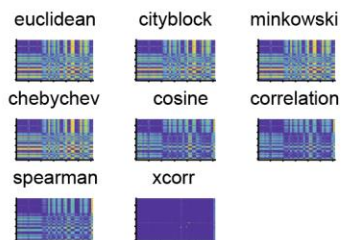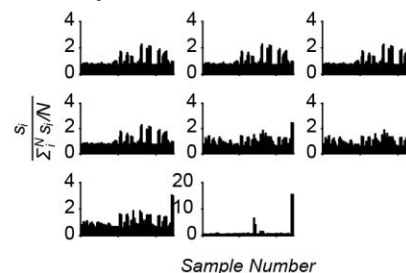

| Analyte                | Hits |
|------------------------|------|
| acetylcholine chloride | 3    |
| adenosine              | 4    |
| ascorbic acid          | 21   |
| camp                   | 2    |
| creatine               | 7    |
| d-fructose             | 4    |
| d-galactose            | 2    |
| dopac (control)        | 5    |
| dopamine               | 21   |
| dox                    | 12   |
| epinephrine            | 21   |
| l-cysteine             | 21   |
| l-dopa                 | 21   |
| l-tyrosine             | 21   |
| nadh                   | 15   |
| norepinephrine         | 21   |
| riboflavin             | 8    |
| serotonin              | 16   |
| urea                   | 4    |

**Corona: DNA CB13 (CCCCCCCAGAATTACTTCCCCCCC)**

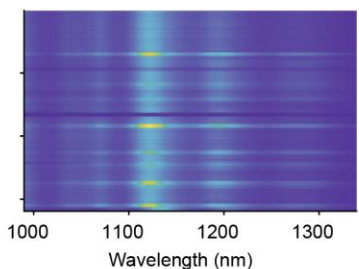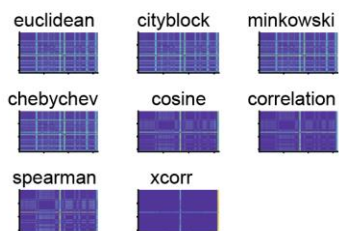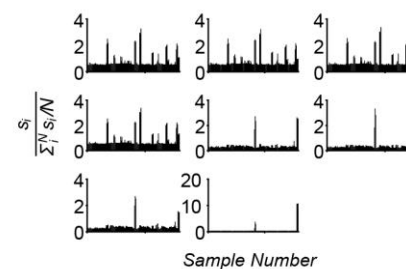

| Analyte        | Hits |
|----------------|------|
| ascorbic acid  | 15   |
| control        | 3    |
| d-mannose      | 1    |
| dopamine       | 26   |
| dox            | 24   |
| epinephrine    | 12   |
| gmp            | 3    |
| guanosine      | 12   |
| l-cysteine     | 12   |
| l-dopa         | 8    |
| nadh           | 1    |
| norepinephrine | 6    |
| riboflavin     | 24   |

**Corona: DNA CB4 (CCCCCCCCCAGGCGGGGCCCCCCC)**

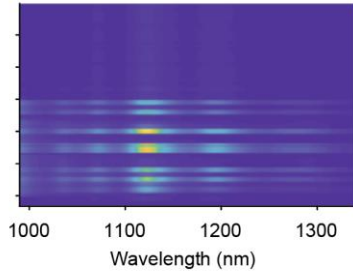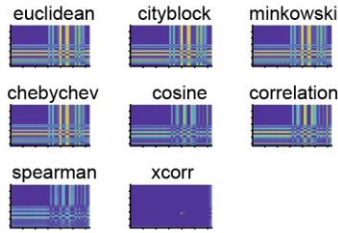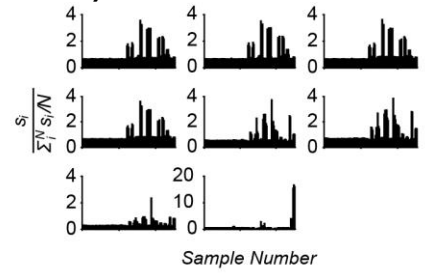

| Analyte           | Hits |
|-------------------|------|
| 17-beta-estradiol | 9    |
| ascorbic acid     | 13   |
| control           | 3    |
| creatine          | 10   |
| dopac (control)   | 9    |
| dopamine          | 12   |
| dox               | 12   |
| epinephrine       | 12   |
| glutamic acid     | 9    |
| glycine           | 9    |
| l-aspartic acid   | 9    |
| l-cysteine        | 12   |
| l-tyrosine        | 12   |
| melatonin         | 9    |
| nadh              | 12   |
| oxytocin          | 12   |
| riboflavin        | 6    |
| serotonin         | 12   |
| urea              | 6    |

**Corona: DNA CB3 (CCCCCCCCTCCGCAAGTCCCCCCC)**

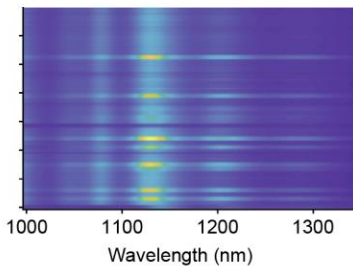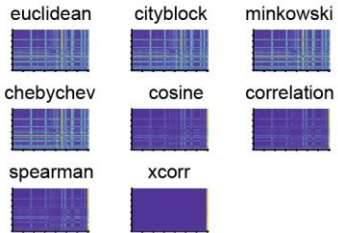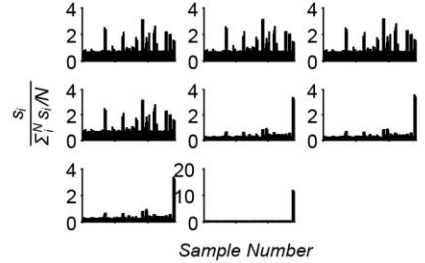

| Analyte        | Hits |
|----------------|------|
| ascorbic acid  | 21   |
| cysteine       | 21   |
| dopamine       | 33   |
| dox            | 24   |
| epinephrine    | 20   |
| glutamic acid  | 4    |
| l-dopa         | 21   |
| nadh           | 12   |
| norepinephrine | 21   |
| riboflavin     | 12   |



**Figure S2.** Principal component analysis for the analytes screened against different SWNT-nanosensor candidates. Each dataset is plotted using the first 3 principal component coordinates. Clusters, indicated by colors, were generated by hierarchical clustering with normalized PC coordinates and cluster centroid distances calculated using the Euclidean distance. A plot of the loadings shows the spectral characteristic of each principal component.

### Corona: DNA (TTA)<sub>4</sub>TT

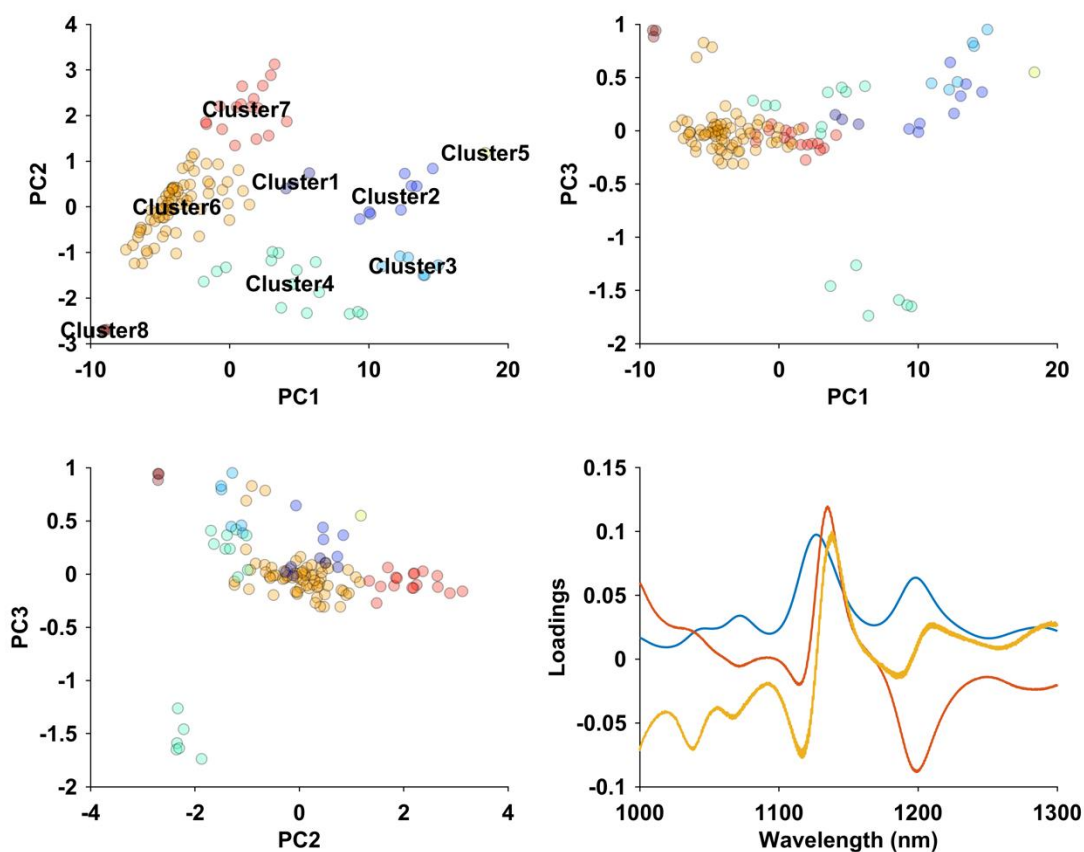

| Analyte        | Cluster | Analyte                | Cluster | Analyte           | Cluster | Analyte         | Cluster | Analyte           | Cluster |
|----------------|---------|------------------------|---------|-------------------|---------|-----------------|---------|-------------------|---------|
| NADH           | 1       | Oxytocin               | 4       | D-Glucose         | 6       | Creatine        | 6       | Homovanillic acid | 7       |
| NADH           | 1       | Oxytocin               | 4       | Guanosine         | 6       | Glutamic acid   | 6       | Melatonin         | 7       |
| NADH           | 1       | Oxytocin               | 4       | Guanosine         | 6       | Glutamic acid   | 6       | Melatonin         | 7       |
| Serotonin      | 2       | Dopamine               | 5       | Guanosine         | 6       | Glutamic acid   | 6       | Melatonin         | 7       |
| Serotonin      | 2       | 2,4-dinitrophenol      | 6       | Histamine         | 6       | Glycine         | 6       | DOX               | 8       |
| Serotonin      | 2       | 2,4-dinitrophenol      | 6       | Histamine         | 6       | Glycine         | 6       | DOX               | 8       |
| Dopamine       | 2       | 2,4-dinitrophenol      | 6       | Histamine         | 6       | Glycine         | 6       | DOX               | 8       |
| Dopamine       | 2       | Acetylcholine Chloride | 6       | Homovanillic acid | 6       | L-Aspartic acid | 6       |                   |         |
| Norepinephrine | 2       | Acetylcholine Chloride | 6       | Homovanillic acid | 6       | L-Aspartic acid | 6       |                   |         |
| Norepinephrine | 2       | Adenosine              | 6       | L-Citrulline      | 6       | L-Histidine     | 6       |                   |         |
| Ascorbic acid  | 3       | Adenosine              | 6       | L-Citrulline      | 6       | L-Histidine     | 6       |                   |         |
| Ascorbic acid  | 3       | Adenosine              | 6       | L-Phenylalanine   | 6       | L-Histidine     | 6       |                   |         |
| Ascorbic acid  | 3       | ATP                    | 6       | L-Phenylalanine   | 6       | Urea            | 6       |                   |         |
| L-Cysteine     | 3       | ATP                    | 6       | L-Phenylalanine   | 6       | Urea            | 6       |                   |         |
| L-Cysteine     | 3       | ATP                    | 6       | L-Thyroxine       | 6       | Urea            | 6       |                   |         |
| L-Cysteine     | 3       | cAMP                   | 6       | L-Thyroxine       | 6       | Cytidine        | 7       |                   |         |
| L-Dopa         | 4       | cAMP                   | 6       | L-Thyroxine       | 6       | Cytidine        | 7       |                   |         |
| L-Dopa         | 4       | cAMP                   | 6       | Riboflavin        | 6       | Cytidine        | 7       |                   |         |
| L-Dopa         | 4       | D-Aspartic acid        | 6       | Riboflavin        | 6       | D-Galactose     | 7       |                   |         |
| L-Tyrosine     | 4       | D-Aspartic acid        | 6       | Riboflavin        | 6       | D-Mannitol      | 7       |                   |         |
| L-Tyrosine     | 4       | D-Aspartic acid        | 6       | 17-beta-estradiol | 6       | D-Mannitol      | 7       |                   |         |
| L-Tyrosine     | 4       | D-Fructose             | 6       | 17-beta-estradiol | 6       | D-Mannitol      | 7       |                   |         |
| DOPAC          | 4       | D-Fructose             | 6       | 17-beta-estradiol | 6       | D-Mannose       | 7       |                   |         |
| DOPAC          | 4       | D-Fructose             | 6       | 17-beta-estradiol | 6       | D-Mannose       | 7       |                   |         |
| DOPAC          | 4       | D-Galactose            | 6       | Ampicillin        | 6       | D-Mannose       | 7       |                   |         |
| Epinephrine    | 4       | D-Galactose            | 6       | Ampicillin        | 6       | D-Mannose       | 7       |                   |         |
| Epinephrine    | 4       | D-Glucose              | 6       | Creatine          | 6       | GABA            | 7       |                   |         |
| Epinephrine    | 4       | D-Glucose              | 6       | Creatine          | 6       | GABA            | 7       |                   |         |



# Corona: DNA (TAT)<sub>4</sub>

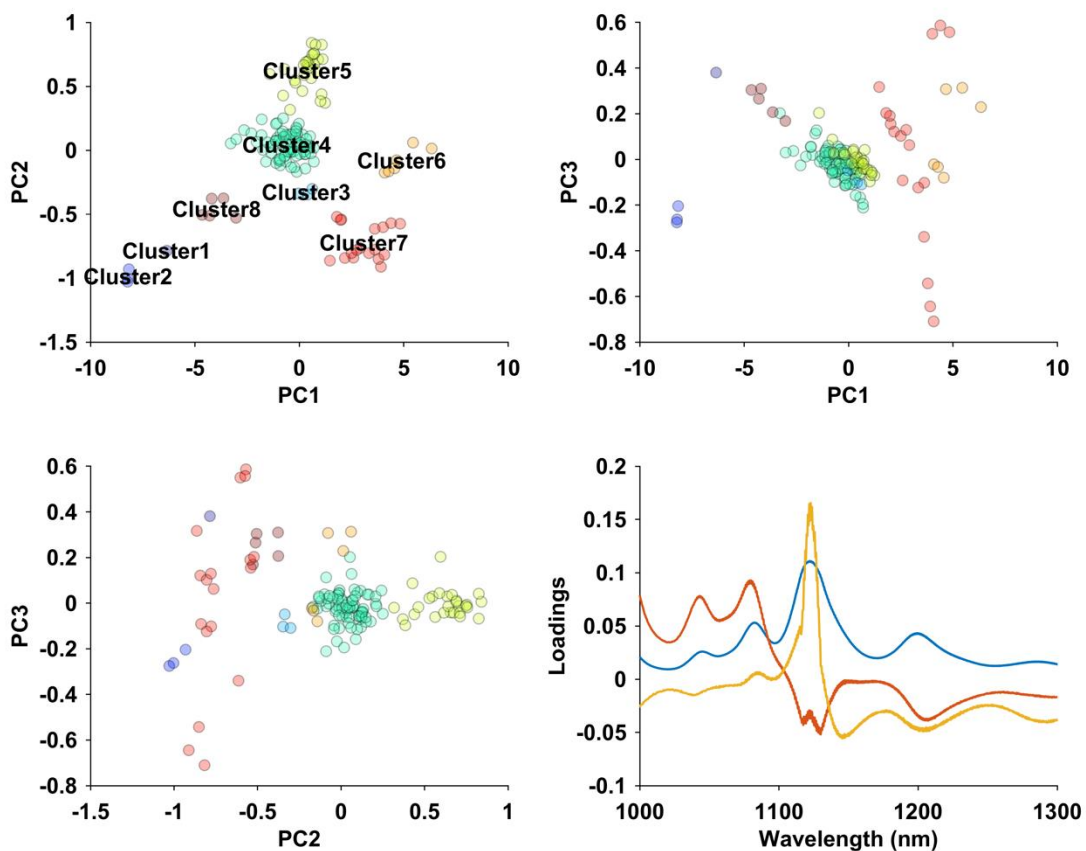

| Analyte           | Cluster | Analyte           | Cluster | Analyte         | Cluster | Analyte       | Cluster | Analyte        | Cluster |
|-------------------|---------|-------------------|---------|-----------------|---------|---------------|---------|----------------|---------|
| L-thyroxine       | 1       | D-fructose        | 4       | L-citruline     | 4       | Control       | 5       | Cysteine       | 6       |
| DOX               | 2       | D-fructose        | 4       | L-citruline     | 4       | Glycine       | 5       | Cysteine       | 6       |
| DOX               | 2       | D-galactose       | 4       | L-phenylalanine | 4       | Glycine       | 5       | dopamine       | 7       |
| DOX               | 2       | D-galactose       | 4       | L-phenylalanine | 4       | Glycine       | 5       | dopamine       | 7       |
| L-tyrosine        | 3       | D-galactose       | 4       | L-phenylalanine | 4       | NADH          | 5       | dopamine       | 7       |
| L-tyrosine        | 3       | D-glucose         | 4       | Melatonin       | 4       | NADH          | 5       | L-DOPA         | 7       |
| L-tyrosine        | 3       | D-glucose         | 4       | Melatonin       | 4       | NADH          | 5       | L-DOPA         | 7       |
| control           | 4       | D-glucose         | 4       | Melatonin       | 4       | AMP           | 5       | L-DOPA         | 7       |
| control           | 4       | GABA              | 4       | Oxytocin        | 4       | AMP           | 5       | Serotonin      | 7       |
| control           | 4       | GABA              | 4       | Oxytocin        | 4       | AMP           | 5       | Serotonin      | 7       |
| 2,4 dinitrophenol | 4       | GABA              | 4       | Oxytocin        | 4       | CMP           | 5       | Serotonin      | 7       |
| 2,4 dinitrophenol | 4       | adenosine         | 4       | Riboflavin      | 4       | CMP           | 5       | Ascorbic acid  | 7       |
| 2,4 dinitrophenol | 4       | adenosine         | 4       | Riboflavin      | 4       | CMP           | 5       | Ascorbic acid  | 7       |
| acetylcholine     | 4       | D-mannitol        | 4       | Riboflavin      | 4       | GMP           | 5       | Ascorbic acid  | 7       |
| acetylcholine     | 4       | D-mannitol        | 4       | Estradiol       | 4       | GMP           | 5       | Norepinephrine | 7       |
| acetylcholine     | 4       | D-mannitol        | 4       | Estradiol       | 4       | GMP           | 5       | Norepinephrine | 7       |
| ATP               | 4       | D-mannose         | 4       | Estradiol       | 4       | TMP           | 5       | Norepinephrine | 7       |
| ATP               | 4       | D-mannose         | 4       | Ampicillin      | 4       | TMP           | 5       | Epinephrine    | 7       |
| ATP               | 4       | D-mannose         | 4       | Ampicillin      | 4       | TMP           | 5       | Epinephrine    | 7       |
| cAMP              | 4       | Histamine         | 4       | Ampicillin      | 4       | Aspartic acid | 5       | Epinephrine    | 7       |
| cAMP              | 4       | Histamine         | 4       | Creatine        | 4       | Aspartic acid | 5       | Guanosine      | 8       |
| cAMP              | 4       | Histamine         | 4       | Creatine        | 4       | Aspartic acid | 5       | Guanosine      | 8       |
| cytidine          | 4       | control           | 4       | Creatine        | 4       | Histamine     | 5       | Guanosine      | 8       |
| cytidine          | 4       | control           | 4       | Glutamic acid   | 4       | Histamine     | 5       | L-thyroxine    | 8       |
| cytidine          | 4       | control           | 4       | Glutamic acid   | 4       | Histamine     | 5       | L-thyroxine    | 8       |
| D-aspartic acid   | 4       | Homovanillic acid | 4       | Glutamic acid   | 4       | Dopamine      | 6       |                |         |
| D-aspartic acid   | 4       | Homovanillic acid | 4       | adenosine       | 4       | Dopamine      | 6       |                |         |
| D-aspartic acid   | 4       | Homovanillic acid | 4       | Control         | 5       | Dopamine      | 6       |                |         |
| D-fructose        | 4       | L-citruline       | 4       | Control         | 5       | Cysteine      | 6       |                |         |

# Corona: RITC-PEG-RITC

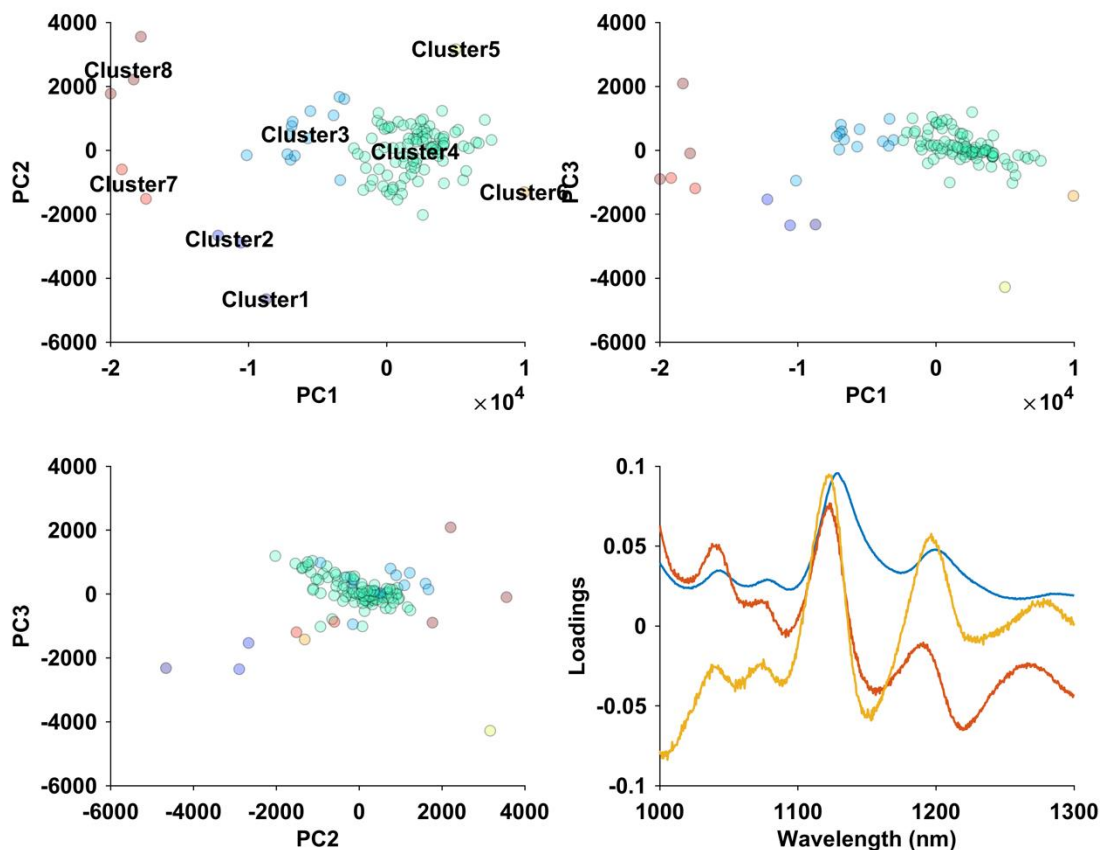

| Analyte           | Cluster | Analyte         | Cluster | Analyte       | Cluster | Analyte        | Cluster |
|-------------------|---------|-----------------|---------|---------------|---------|----------------|---------|
| thyroxine         | 1       | cytidine        | 4       | l-dopa        | 4       | glutamic acid  | 4       |
| thyroxine         | 2       | cytidine        | 4       | l-dopa        | 4       | glutamic acid  | 4       |
| thyroxine         | 2       | d-mannose       | 4       | l-dopa        | 4       | glycine        | 4       |
| guanosine         | 3       | d-mannose       | 4       | phenylalanine | 4       | glycine        | 4       |
| guanosine         | 3       | d-mannose       | 4       | phenylalanine | 4       | glycine        | 4       |
| guanosine         | 3       | d-aspartic acid | 4       | phenylalanine | 4       | l-cysteine     | 4       |
| tyrosine          | 3       | d-aspartic acid | 4       | melatonin     | 4       | l-cysteine     | 4       |
| tyrosine          | 3       | d-aspartic acid | 4       | melatonin     | 4       | l-cysteine     | 4       |
| tyrosine          | 3       | d-fructose      | 4       | melatonin     | 4       | control        | 4       |
| serotonin         | 3       | d-fructose      | 4       | riboflavin    | 4       | control        | 4       |
| serotonin         | 3       | d-fructose      | 4       | riboflavin    | 4       | control        | 4       |
| riboflavin        | 3       | d-galactose     | 4       | ampicillin    | 4       | histidine      | 4       |
| estradiol         | 3       | d-galactose     | 4       | ampicillin    | 4       | histidine      | 4       |
| estradiol         | 3       | d-galactose     | 4       | ascorbic acid | 4       | histidine      | 4       |
| estradiol         | 3       | glucose         | 4       | ascorbic acid | 4       | NADH           | 4       |
| norepinephrine    | 3       | glucose         | 4       | ascorbic acid | 4       | NADH           | 4       |
| 2,4 dinitrophenol | 4       | glucose         | 4       | urea          | 4       | NADH           | 4       |
| 2,4 dinitrophenol | 4       | mannitol        | 4       | urea          | 4       | norepinephrine | 4       |
| 2,4 dinitrophenol | 4       | mannitol        | 4       | urea          | 4       | norepinephrine | 4       |
| acetylcholine     | 4       | mannitol        | 4       | DOPAC         | 4       | ampicillin     | 5       |
| acetylcholine     | 4       | GABA            | 4       | DOPAC         | 4       | oxytocin       | 6       |
| acetylcholine     | 4       | GABA            | 4       | DOPAC         | 4       | DOX            | 7       |
| adenosine         | 4       | GABA            | 4       | dopamine      | 4       | DOX            | 7       |
| adenosine         | 4       | histamine       | 4       | dopamine      | 4       | cAMP           | 8       |
| ATP               | 4       | histamine       | 4       | dopamine      | 4       | oxytocin       | 8       |
| ATP               | 4       | histamine       | 4       | epinephrine   | 4       | DOX            | 8       |
| cAMP              | 4       | citruiline      | 4       | epinephrine   | 4       |                |         |
| cAMP              | 4       | citruiline      | 4       | epinephrine   | 4       |                |         |
| cytidine          | 4       | citruiline      | 4       | glutamic acid | 4       |                |         |

# Corona: DNA (GT)<sub>15</sub>

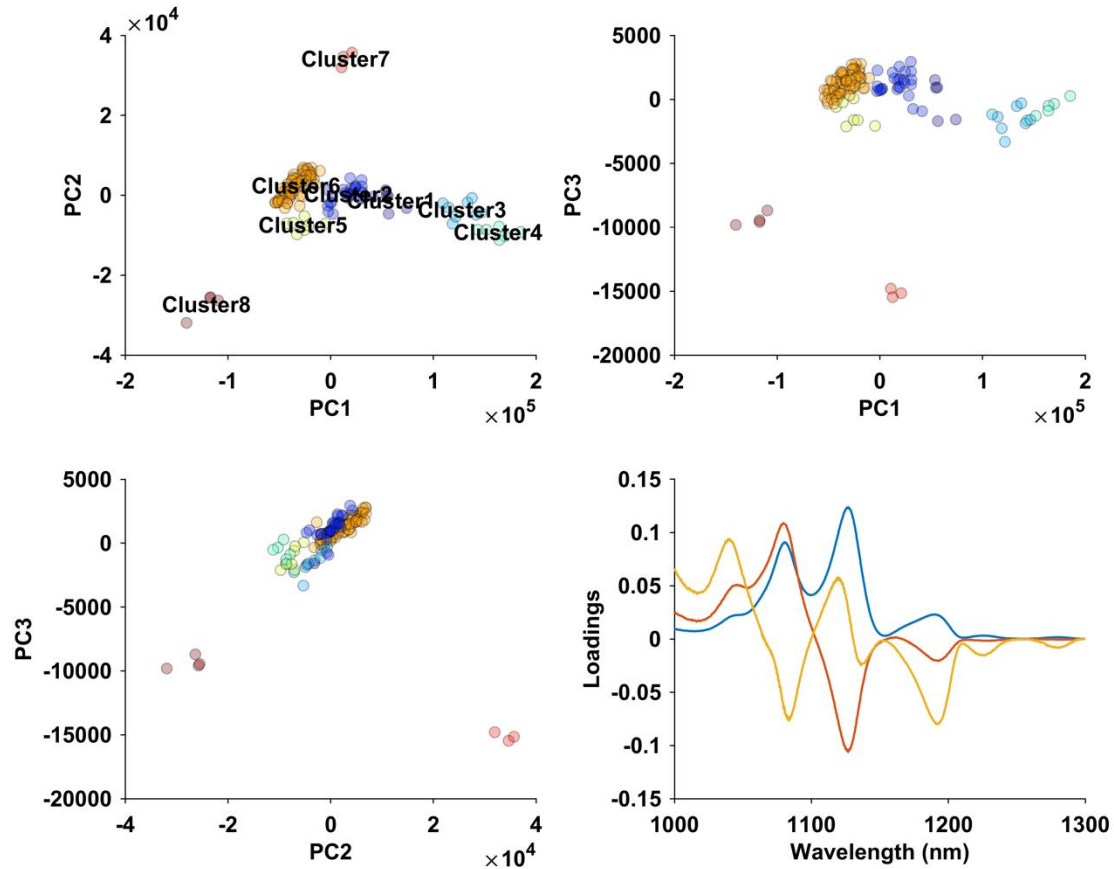

| Analyte           | Cluster | Analyte                | Cluster | Analyte         | Cluster | Analyte           | Cluster | Analyte    | Cluster |
|-------------------|---------|------------------------|---------|-----------------|---------|-------------------|---------|------------|---------|
| Ampicillin        | 1       | Urea                   | 2       | Adenosine       | 6       | GABA              | 6       | Riboflavin | 8       |
| Ampicillin        | 1       | DOPAC                  | 3       | ATP             | 6       | Guanosine         | 6       | Riboflavin | 8       |
| Ampicillin        | 1       | DOPAC                  | 3       | ATP             | 6       | Guanosine         | 6       | Creatine   | 8       |
| NADH              | 1       | Dopamine               | 3       | cAMP            | 6       | Guanosine         | 6       | L-Cysteine | 8       |
| NADH              | 1       | L-Cysteine             | 3       | cAMP            | 6       | Histamine         | 6       |            |         |
| L-Tyrosine        | 2       | L-Cysteine             | 3       | cAMP            | 6       | Histamine         | 6       |            |         |
| L-Tyrosine        | 2       | Norepinephrine         | 3       | Cytidine        | 6       | Histamine         | 6       |            |         |
| Riboflavin        | 2       | Norepinephrine         | 3       | Cytidine        | 6       | Homovanillic acid | 6       |            |         |
| 17-beta-estradiol | 2       | Norepinephrine         | 3       | Cytidine        | 6       | Homovanillic acid | 6       |            |         |
| 17-beta-estradiol | 2       | Ascorbic acid          | 4       | D-Aspartic acid | 6       | Homovanillic acid | 6       |            |         |
| Creatine          | 2       | Ascorbic acid          | 4       | D-Aspartic acid | 6       | L-Citrulline      | 6       |            |         |
| Creatine          | 2       | Ascorbic acid          | 4       | D-Aspartic acid | 6       | L-Citrulline      | 6       |            |         |
| Dopamine          | 2       | Epinephrine            | 4       | D-Fructose      | 6       | L-Citrulline      | 6       |            |         |
| Dopamine          | 2       | Epinephrine            | 4       | D-Fructose      | 6       | L-Dopa            | 6       |            |         |
| Glutamic acid     | 2       | Epinephrine            | 4       | D-Fructose      | 6       | L-Dopa            | 6       |            |         |
| Glutamic acid     | 2       | 2,4-dinitrophenol      | 5       | D-Galactose     | 6       | L-Dopa            | 6       |            |         |
| Glutamic acid     | 2       | ATP                    | 5       | D-Galactose     | 6       | L-Phenylalanine   | 6       |            |         |
| Glycine           | 2       | 17-beta-estradiol      | 5       | D-Galactose     | 6       | L-Phenylalanine   | 6       |            |         |
| Glycine           | 2       | DOPAC                  | 5       | D-Glucose       | 6       | L-Phenylalanine   | 6       |            |         |
| Glycine           | 2       | Oxytocin               | 5       | D-Glucose       | 6       | L-Thyroxine       | 6       |            |         |
| L-Aspartic acid   | 2       | Urea                   | 5       | D-Glucose       | 6       | L-Thyroxine       | 6       |            |         |
| L-Aspartic acid   | 2       | Urea                   | 5       | D-Mannitol      | 6       | L-Thyroxine       | 6       |            |         |
| L-Aspartic acid   | 2       | 2,4-dinitrophenol      | 6       | D-Mannitol      | 6       | L-Tyrosine        | 6       |            |         |
| L-Histidine       | 2       | 2,4-dinitrophenol      | 6       | D-Mannitol      | 6       | Melatonin         | 6       |            |         |
| L-Histidine       | 2       | Acetylcholine Chloride | 6       | D-Mannose       | 6       | Melatonin         | 6       |            |         |
| L-Histidine       | 2       | Acetylcholine Chloride | 6       | D-Mannose       | 6       | Melatonin         | 6       |            |         |
| NADH              | 2       | Acetylcholine Chloride | 6       | D-Mannose       | 6       | Serotonin         | 7       |            |         |
| Oxytocin          | 2       | Adenosine              | 6       | GABA            | 6       | Serotonin         | 7       |            |         |
| Oxytocin          | 2       | Adenosine              | 6       | GABA            | 6       | Serotonin         | 7       |            |         |

# Corona: DNA GTAGTCGAGTGTGTGTGTGTGT

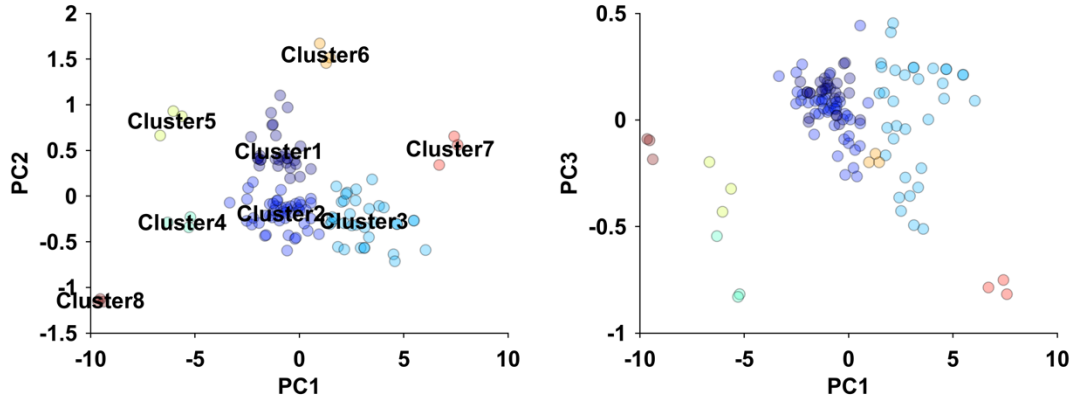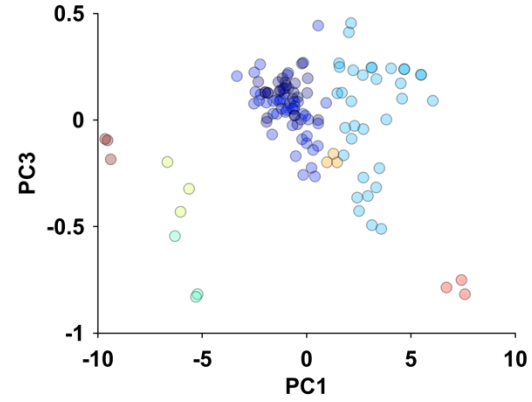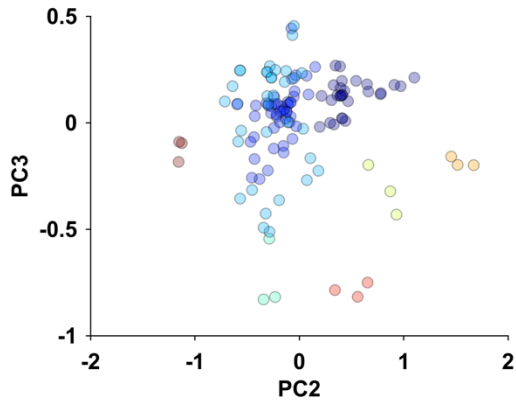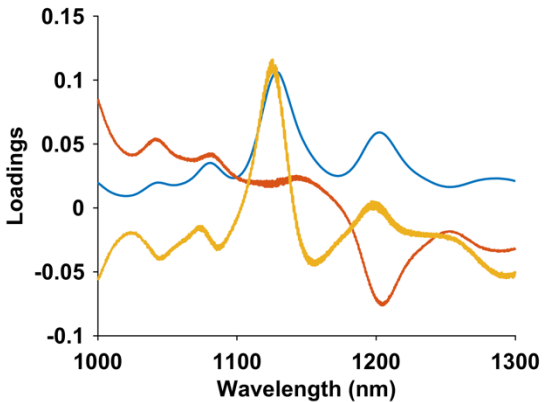

| Analyte           | Cluster | Analyte                | Cluster | Analyte       | Cluster | Analyte           | Cluster | Analyte   | Cluster |
|-------------------|---------|------------------------|---------|---------------|---------|-------------------|---------|-----------|---------|
| D-Aspartic acid   | 1       | 2,4-dinitrophenol      | 2       | GABA          | 2       | Ascorbic acid     | 3       | Melatonin | 6       |
| D-Aspartic acid   | 1       | 2,4-dinitrophenol      | 2       | GABA          | 2       | Ascorbic acid     | 3       | Serotonin | 7       |
| D-Aspartic acid   | 1       | Acetylcholine Chloride | 2       | Guanosine     | 2       | DOPAC             | 3       | Serotonin | 7       |
| Histamine         | 1       | Acetylcholine Chloride | 2       | Guanosine     | 2       | DOPAC             | 3       | Serotonin | 7       |
| Histamine         | 1       | Acetylcholine Chloride | 2       | Guanosine     | 2       | DOPAC             | 3       | DOX       | 8       |
| Histamine         | 1       | Adenosine              | 2       | L-Dopa        | 2       | Dopamine          | 3       | DOX       | 8       |
| Homovanillic acid | 1       | Adenosine              | 2       | L-Thyroxine   | 2       | Dopamine          | 3       | DOX       | 8       |
| Homovanillic acid | 1       | ATP                    | 2       | L-Thyroxine   | 2       | Dopamine          | 3       |           |         |
| Homovanillic acid | 1       | ATP                    | 2       | L-Histidine   | 2       | Epinephrine       | 3       |           |         |
| L-Citrulline      | 1       | ATP                    | 2       | L-Histidine   | 2       | Epinephrine       | 3       |           |         |
| L-Citrulline      | 1       | cAMP                   | 2       | L-Histidine   | 2       | Epinephrine       | 3       |           |         |
| L-Citrulline      | 1       | cAMP                   | 2       | NADH          | 2       | Glutamic acid     | 3       |           |         |
| L-Phenylalanine   | 1       | cAMP                   | 2       | NADH          | 2       | Glutamic acid     | 3       |           |         |
| L-Phenylalanine   | 1       | Cytidine               | 2       | Oxytocin      | 2       | Glutamic acid     | 3       |           |         |
| L-Phenylalanine   | 1       | Cytidine               | 2       | Oxytocin      | 2       | L-Cysteine        | 3       |           |         |
| L-Thyroxine       | 1       | Cytidine               | 2       | Oxytocin      | 2       | L-Cysteine        | 3       |           |         |
| Creatine          | 1       | D-Fructose             | 2       | Adenosine     | 2       | L-Cysteine        | 3       |           |         |
| Creatine          | 1       | D-Fructose             | 2       | D-Glucose     | 3       | NADH              | 3       |           |         |
| Creatine          | 1       | D-Fructose             | 2       | D-Glucose     | 3       | Norepinephrine    | 3       |           |         |
| Glycine           | 1       | D-Galactose            | 2       | D-Glucose     | 3       | Norepinephrine    | 3       |           |         |
| Glycine           | 1       | D-Galactose            | 2       | L-Dopa        | 3       | Norepinephrine    | 3       |           |         |
| Glycine           | 1       | D-Galactose            | 2       | L-Dopa        | 3       | Riboflavin        | 4       |           |         |
| L-Aspartic acid   | 1       | D-Mannitol             | 2       | L-Tyrosine    | 3       | Riboflavin        | 4       |           |         |
| L-Aspartic acid   | 1       | D-Mannitol             | 2       | L-Tyrosine    | 3       | Riboflavin        | 4       |           |         |
| L-Aspartic acid   | 1       | D-Mannitol             | 2       | L-Tyrosine    | 3       | Riboflavin        | 4       |           |         |
| Urea              | 1       | D-Mannose              | 2       | L-Tyrosine    | 3       | 17-beta-estradiol | 5       |           |         |
| Urea              | 1       | D-Mannose              | 2       | Ampicillin    | 3       | 17-beta-estradiol | 5       |           |         |
| Urea              | 1       | D-Mannose              | 2       | Ampicillin    | 3       | 17-beta-estradiol | 5       |           |         |
| Urea              | 1       | D-Mannose              | 2       | Ampicillin    | 3       | Melatonin         | 6       |           |         |
| 2,4-dinitrophenol | 2       | GABA                   | 2       | Ascorbic acid | 3       | Melatonin         | 6       |           |         |

# Corona: Phospholipid DTTE-PEG2k

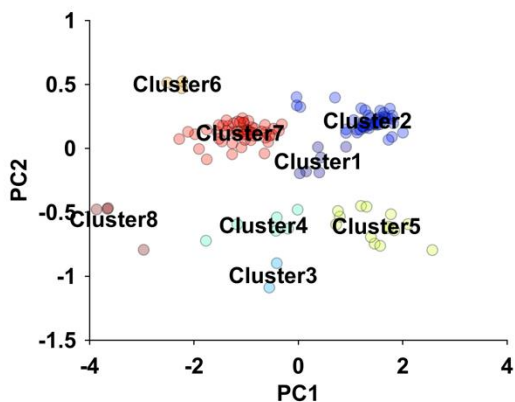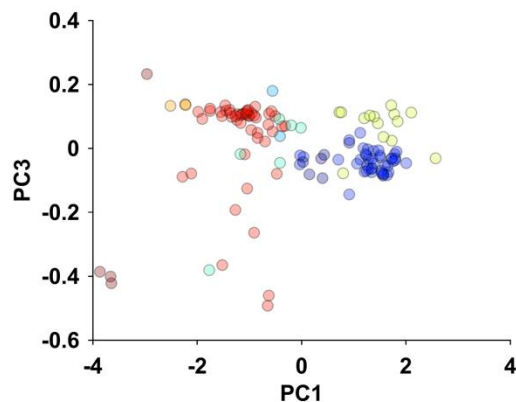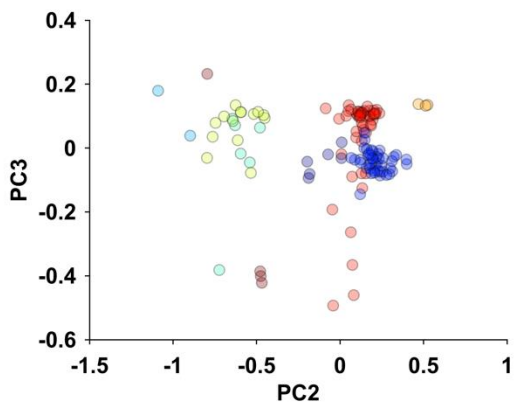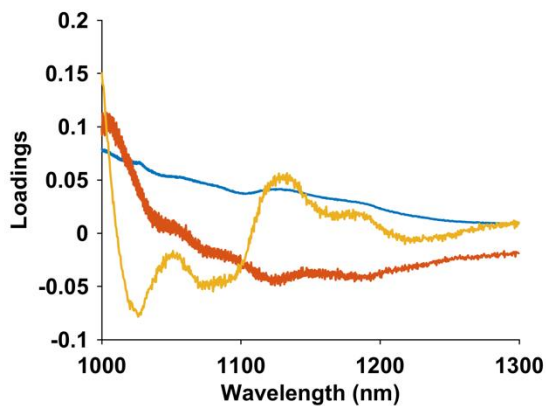

| Analyte         | Cluster | Analyte        | Cluster | Analyte           | Cluster | Analyte         | Cluster | Analyte     | Cluster |
|-----------------|---------|----------------|---------|-------------------|---------|-----------------|---------|-------------|---------|
| ascorbic acid   | 1       | glycine        | 2       | control           | 2       | cAMP            | 5       | l-dopa      | 7       |
| dopamine        | 1       | glycine        | 2       | control           | 2       | cAMP            | 5       | thyroxine   | 7       |
| dopamine        | 1       | glycine        | 2       | control           | 2       | cAMP            | 5       | thyroxine   | 7       |
| dopamine        | 1       | l-cysteine     | 2       | thyroxine         | 2       | cytidine        | 5       | thyroxine   | 7       |
| norepinephrine  | 1       | l-cysteine     | 2       | melatonin         | 2       | cytidine        | 5       | tyrosine    | 7       |
| norepinephrine  | 1       | l-cysteine     | 2       | melatonin         | 2       | cytidine        | 5       | tyrosine    | 7       |
| l-phenylalanine | 2       | l-histidine    | 2       | serotonin         | 5       | d-aspartic acid | 5       | tyrosine    | 7       |
| l-phenylalanine | 2       | l-histidine    | 2       | serotonin         | 5       | d-aspartic acid | 5       | riboflavin  | 7       |
| l-phenylalanine | 2       | l-histidine    | 2       | riboflavin        | 5       | d-aspartic acid | 5       | riboflavin  | 7       |
| riboflavin      | 2       | NADH           | 2       | riboflavin        | 5       | d-galactose     | 5       | melatonin   | 8       |
| estradiol       | 2       | NADH           | 2       | riboflavin        | 5       | d-galactose     | 5       | melatonin   | 8       |
| estradiol       | 2       | NADH           | 2       | estradiol         | 5       | d-galactose     | 5       | melatonin   | 8       |
| estradiol       | 2       | oxytocin       | 2       | estradiol         | 5       | d-glucose       | 5       | epinephrine | 8       |
| amphicilin      | 2       | oxytocin       | 2       | estradiol         | 5       | d-glucose       | 5       |             |         |
| amphicilin      | 2       | oxytocin       | 2       | DOX               | 6       | d-glucose       | 5       |             |         |
| amphicilin      | 2       | control        | 2       | DOX               | 6       | d-mannitol      | 6       |             |         |
| ascorbic acid   | 2       | control        | 2       | DOX               | 6       | d-mannitol      | 6       |             |         |
| ascorbic acid   | 2       | control        | 2       | 2,4 dinitrophenol | 7       | d-mannitol      | 7       |             |         |
| creatine        | 2       | control        | 2       | 2,4 dinitrophenol | 7       | d-mannose       | 7       |             |         |
| creatine        | 2       | control        | 2       | 2,4 dinitrophenol | 7       | d-mannose       | 7       |             |         |
| creatine        | 2       | control        | 2       | acetylcholine     | 7       | d-mannose       | 7       |             |         |
| DOPAC           | 2       | melatonin      | 3       | acetylcholine     | 7       | GABA            | 7       |             |         |
| DOPAC           | 2       | serotonin      | 3       | acetylcholine     | 7       | GABA            | 7       |             |         |
| DOPAC           | 2       | norepinephrine | 4       | adenosine         | 7       | GABA            | 7       |             |         |
| epinephrine     | 2       | thyroxine      | 4       | adenosine         | 7       | l-citruline     | 7       |             |         |
| epinephrine     | 2       | thyroxine      | 4       | adenosine         | 7       | l-citruline     | 7       |             |         |
| glutamic acid   | 2       | tyrosine       | 4       | ATP               | 7       | l-citruline     | 7       |             |         |
| glutamic acid   | 2       | tyrosine       | 4       | ATP               | 7       | l-dopa          | 7       |             |         |
| glutamic acid   | 2       | tyrosine       | 4       | ATP               | 7       | l-dopa          | 7       |             |         |

# Corona: DNA (CCA)<sub>10</sub>

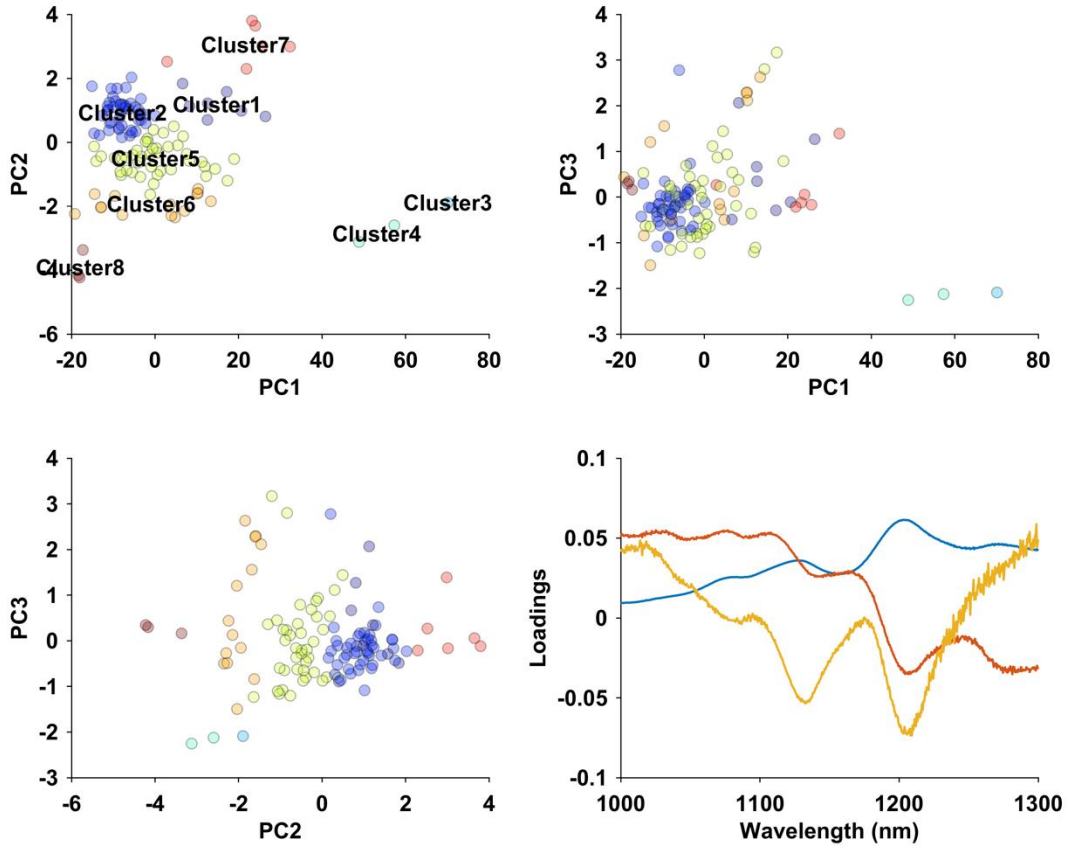

| Analyte           | Cluster | Analyte                | Cluster | Analyte                | Cluster | Analyte           | Cluster | Analyte     | Cluster |
|-------------------|---------|------------------------|---------|------------------------|---------|-------------------|---------|-------------|---------|
| 2,4-dinitrophenol | 1       | L-Phenylalanine        | 2       | Acetylcholine Chloride | 5       | L-Aspartic acid   | 5       | Epinephrine | 7       |
| D-Mannitol        | 1       | Melatonin              | 2       | Acetylcholine Chloride | 5       | L-Aspartic acid   | 5       | Riboflavin  | 8       |
| Ascorbic acid     | 1       | Melatonin              | 2       | Cytidine               | 5       | L-Aspartic acid   | 5       | Riboflavin  | 8       |
| Ascorbic acid     | 1       | Melatonin              | 2       | Cytidine               | 5       | L-Cysteine        | 5       | Riboflavin  | 8       |
| Dopamine          | 1       | Serotonin              | 2       | D-Aspartic acid        | 5       | L-Histidine       | 5       |             |         |
| Epinephrine       | 1       | Ampicillin             | 2       | D-Aspartic acid        | 5       | L-Histidine       | 5       |             |         |
| Norepinephrine    | 1       | Ampicillin             | 2       | D-Aspartic acid        | 5       | L-Histidine       | 5       |             |         |
| Adenosine         | 2       | Ampicillin             | 2       | D-Fructose             | 5       | Norepinephrine    | 5       |             |         |
| Adenosine         | 2       | Creatine               | 2       | D-Mannitol             | 5       | Norepinephrine    | 5       |             |         |
| Adenosine         | 2       | Creatine               | 2       | D-Mannose              | 5       | Oxytocin          | 5       |             |         |
| cAMP              | 2       | Creatine               | 2       | D-Mannose              | 5       | ATP               | 6       |             |         |
| cAMP              | 2       | Glutamic acid          | 2       | GABA                   | 5       | ATP               | 6       |             |         |
| Cytidine          | 2       | Glutamic acid          | 2       | Histamine              | 5       | ATP               | 6       |             |         |
| D-Fructose        | 2       | Glutamic acid          | 2       | Histamine              | 5       | cAMP              | 6       |             |         |
| D-Fructose        | 2       | Glycine                | 2       | Homovanillic acid      | 5       | L-Thyroxine       | 6       |             |         |
| D-Galactose       | 2       | Glycine                | 2       | Homovanillic acid      | 5       | L-Thyroxine       | 6       |             |         |
| D-Galactose       | 2       | Glycine                | 2       | L-Citrulline           | 5       | L-Thyroxine       | 6       |             |         |
| D-Galactose       | 2       | NADH                   | 2       | L-Citrulline           | 5       | L-Tyrosine        | 6       |             |         |
| D-Glucose         | 2       | NADH                   | 2       | L-Phenylalanine        | 5       | L-Tyrosine        | 6       |             |         |
| D-Glucose         | 2       | NADH                   | 2       | L-Phenylalanine        | 5       | 17-beta-estradiol | 6       |             |         |
| D-Glucose         | 2       | Urea                   | 2       | L-Tyrosine             | 5       | L-Cysteine        | 6       |             |         |
| D-Mannitol        | 2       | Urea                   | 2       | Serotonin              | 5       | L-Cysteine        | 6       |             |         |
| D-Mannose         | 2       | Urea                   | 2       | Serotonin              | 5       | Oxytocin          | 6       |             |         |
| GABA              | 2       | L-Dopa                 | 3       | 17-beta-estradiol      | 5       | Oxytocin          | 6       |             |         |
| GABA              | 2       | L-Dopa                 | 4       | 17-beta-estradiol      | 5       | Histamine         | 7       |             |         |
| Guanosine         | 2       | L-Dopa                 | 4       | Ascorbic acid          | 5       | Homovanillic acid | 7       |             |         |
| Guanosine         | 2       | 2,4-dinitrophenol      | 5       | DOPAC                  | 5       | Dopamine          | 7       |             |         |
| Guanosine         | 2       | 2,4-dinitrophenol      | 5       | DOPAC                  | 5       | Dopamine          | 7       |             |         |
| L-Citrulline      | 2       | Acetylcholine Chloride | 5       | DOPAC                  | 5       | Epinephrine       | 7       |             |         |

# Corona: DNA CB14 (CCCCCCCACCGGCGTTTCCCCCCC)

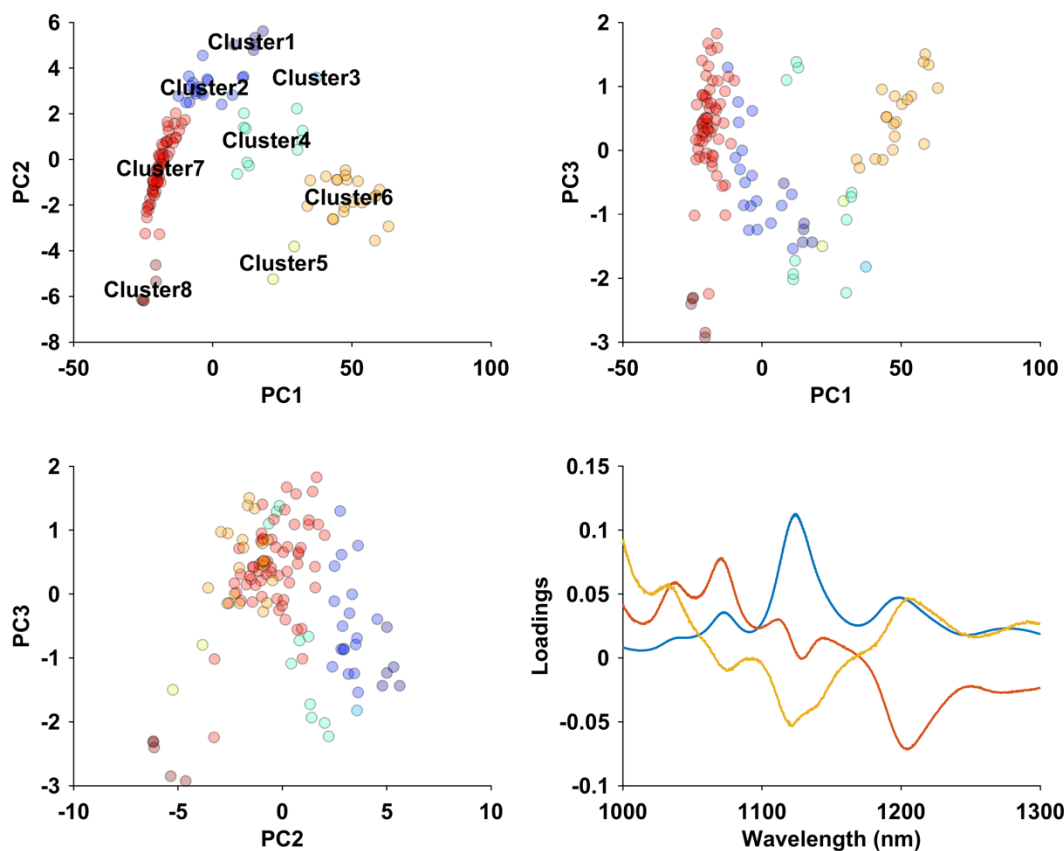

| Analyte           | Cluster | Analyte           | Cluster | Analyte                | Cluster | Analyte           | Cluster | Analyte    | Cluster |
|-------------------|---------|-------------------|---------|------------------------|---------|-------------------|---------|------------|---------|
| Homovanillic acid | 1       | Serotonin         | 4       | 2,4-dinitrophenol      | 7       | D-Mannose         | 7       | Urea       | 7       |
| Homovanillic acid | 1       | Ampicillin        | 4       | Acetylcholine Chloride | 7       | D-Mannose         | 7       | Urea       | 7       |
| Oxytocin          | 1       | Ampicillin        | 4       | Acetylcholine Chloride | 7       | GABA              | 7       | Riboflavin | 8       |
| Oxytocin          | 1       | Ampicillin        | 4       | Acetylcholine Chloride | 7       | GABA              | 7       | Riboflavin | 8       |
| Oxytocin          | 1       | NADH              | 4       | Adenosine              | 7       | GABA              | 7       | DOX        | 8       |
| D-Aspartic acid   | 2       | L-Dopa            | 5       | Adenosine              | 7       | Guanosine         | 7       | DOX        | 8       |
| D-Aspartic acid   | 2       | Ascorbic acid     | 5       | Adenosine              | 7       | Guanosine         | 7       | DOX        | 8       |
| D-Mannose         | 2       | L-Dopa            | 6       | ATP                    | 7       | L-Citrulline      | 7       |            |         |
| Guanosine         | 2       | L-Dopa            | 6       | ATP                    | 7       | L-Citrulline      | 7       |            |         |
| Histamine         | 2       | L-Tyrosine        | 6       | ATP                    | 7       | L-Citrulline      | 7       |            |         |
| Histamine         | 2       | L-Tyrosine        | 6       | cAMP                   | 7       | Melatonin         | 7       |            |         |
| Histamine         | 2       | L-Tyrosine        | 6       | cAMP                   | 7       | Melatonin         | 7       |            |         |
| Homovanillic acid | 2       | Ascorbic acid     | 6       | cAMP                   | 7       | Riboflavin        | 7       |            |         |
| L-Phenylalanine   | 2       | Ascorbic acid     | 6       | Cytidine               | 7       | 17-beta-estradiol | 7       |            |         |
| L-Phenylalanine   | 2       | Dopamine          | 6       | Cytidine               | 7       | 17-beta-estradiol | 7       |            |         |
| L-Phenylalanine   | 2       | Dopamine          | 6       | Cytidine               | 7       | 17-beta-estradiol | 7       |            |         |
| Melatonin         | 2       | Dopamine          | 6       | D-Aspartic acid        | 7       | Creatine          | 7       |            |         |
| L-Aspartic acid   | 2       | Epinephrine       | 6       | D-Fructose             | 7       | Creatine          | 7       |            |         |
| L-Aspartic acid   | 2       | Epinephrine       | 6       | D-Fructose             | 7       | Creatine          | 7       |            |         |
| L-Aspartic acid   | 2       | Epinephrine       | 6       | D-Fructose             | 7       | DOPAC (control)   | 7       |            |         |
| L-Histidine       | 2       | L-Cysteine        | 6       | D-Galactose            | 7       | DOPAC (control)   | 7       |            |         |
| L-Histidine       | 2       | L-Cysteine        | 6       | D-Galactose            | 7       | DOPAC (control)   | 7       |            |         |
| L-Histidine       | 2       | L-Cysteine        | 6       | D-Galactose            | 7       | Glutamic acid     | 7       |            |         |
| NADH              | 3       | NADH              | 6       | D-Glucose              | 7       | Glutamic acid     | 7       |            |         |
| L-Thyroxine       | 4       | Norepinephrine    | 6       | D-Glucose              | 7       | Glutamic acid     | 7       |            |         |
| L-Thyroxine       | 4       | Norepinephrine    | 6       | D-Glucose              | 7       | Glycine           | 7       |            |         |
| L-Thyroxine       | 4       | Norepinephrine    | 6       | D-Mannitol             | 7       | Glycine           | 7       |            |         |
| Serotonin         | 4       | 2,4-dinitrophenol | 7       | D-Mannitol             | 7       | Glycine           | 7       |            |         |
| Serotonin         | 4       | 2,4-dinitrophenol | 7       | D-Mannitol             | 7       | Urea              | 7       |            |         |



# Corona: DNA CB13 (CCCCCCCAGAATTACTTCCCCCCC)

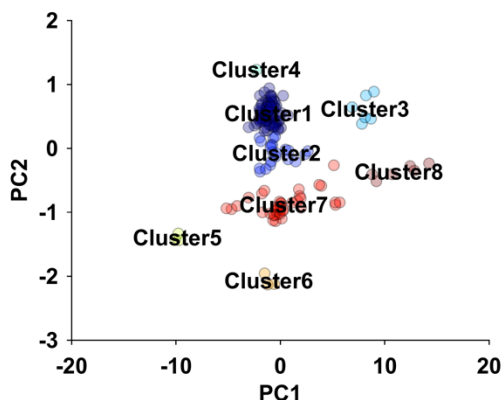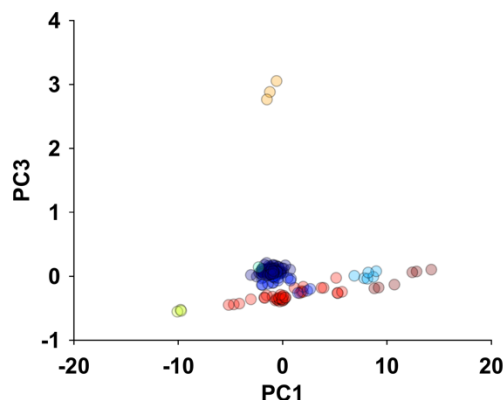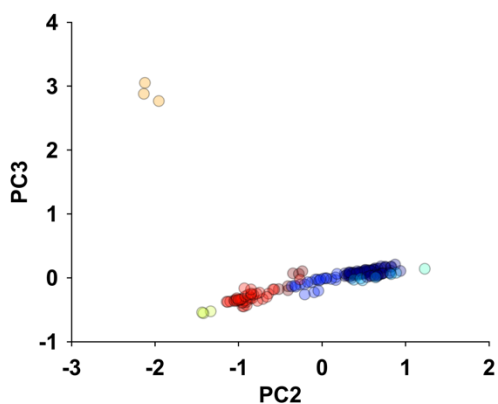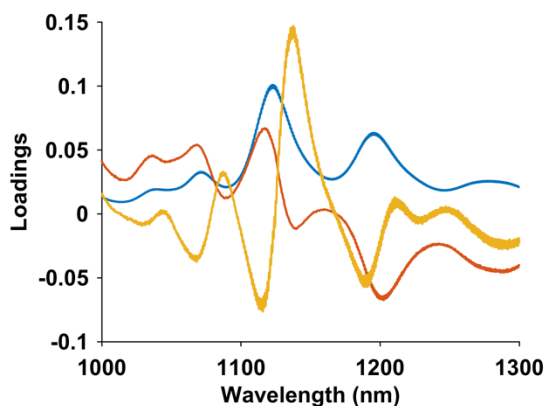

| Analyte                | Cluster | Analyte         | Cluster | Analyte         | Cluster | Analyte         | Cluster | Analyte           | Cluster | Analyte        | Cluster |
|------------------------|---------|-----------------|---------|-----------------|---------|-----------------|---------|-------------------|---------|----------------|---------|
| 2,4 dinitrophenol      | 1       | GABA            | 1       | control         | 1       | b-estradiol     | 2       | Control           | 7       | Melatonin      | 7       |
| 2,4 dinitrophenol      | 1       | GABA            | 1       | control         | 1       | b-estradiol     | 2       | D-Mannose         | 7       | Melatonin      | 7       |
| 2,4 dinitrophenol      | 1       | control         | 1       | urea            | 1       | I-aspartic acid | 2       | D-Mannose         | 7       | I-cysteine     | 7       |
| acetylcholine chloride | 1       | control         | 1       | urea            | 1       | I-aspartic acid | 2       | D-Mannose         | 7       | I-cysteine     | 7       |
| acetylcholine chloride | 1       | control         | 1       | urea            | 1       | I-histidine     | 2       | Guanosine         | 7       | I-cysteine     | 7       |
| adenosine              | 1       | control         | 1       | Control         | 1       | I-histidine     | 2       | Guanosine         | 7       | norepinephrine | 7       |
| adenosine              | 1       | control         | 1       | Control         | 1       | I-histidine     | 2       | Guanosine         | 7       | norepinephrine | 7       |
| adenosine              | 1       | D-mannitol      | 1       | Control         | 1       | control         | 2       | Histamine         | 7       | norepinephrine | 7       |
| ATP                    | 1       | D-mannitol      | 1       | Control         | 1       | oxytocin        | 2       | Histamine         | 7       | dopamine       | 8       |
| ATP                    | 1       | D-mannitol      | 1       | Control         | 1       | oxytocin        | 2       | Histamine         | 7       | dopamine       | 8       |
| ATP                    | 1       | ampicillin      | 1       | Control         | 1       | oxytocin        | 2       | Homovanillic acid | 7       | dopamine       | 8       |
| cAMP                   | 1       | ampicillin      | 1       | AMP             | 1       | NADH            | 2       | Homovanillic acid | 7       | ascorbic acid  | 8       |
| cAMP                   | 1       | ampicillin      | 1       | AMP             | 1       | NADH            | 2       | Homovanillic acid | 7       | ascorbic acid  | 8       |
| cAMP                   | 1       | creatine        | 1       | AMP             | 1       | NADH            | 2       | L-Citrulline      | 7       | ascorbic acid  | 8       |
| cytidine               | 1       | creatine        | 1       | CMP             | 1       | Epinephrine     | 3       | L-Citrulline      | 7       |                |         |
| cytidine               | 1       | creatine        | 1       | CMP             | 1       | Epinephrine     | 3       | L-Citrulline      | 7       |                |         |
| cytidine               | 1       | control         | 1       | CMP             | 1       | Epinephrine     | 3       | L-Dopa            | 7       |                |         |
| D-aspartic acid        | 1       | control         | 1       | TMP             | 1       | Dopamine        | 3       | L-Dopa            | 7       |                |         |
| D-aspartic acid        | 1       | control         | 1       | TMP             | 1       | Dopamine        | 3       | L-Dopa            | 7       |                |         |
| D-fructose             | 1       | control         | 1       | TMP             | 1       | Dopamine        | 3       | L-Phenylalanine   | 7       |                |         |
| D-fructose             | 1       | control         | 1       | GMP             | 1       | GMP             | 4       | L-Phenylalanine   | 7       |                |         |
| D-fructose             | 1       | control         | 1       | GMP             | 1       | riboflavin      | 5       | L-Phenylalanine   | 7       |                |         |
| D-galactose            | 1       | glutamic acid   | 1       | adenosine       | 2       | riboflavin      | 5       | L-Thyroxine       | 7       |                |         |
| D-galactose            | 1       | glutamic acid   | 1       | D-aspartic acid | 2       | riboflavin      | 5       | L-Thyroxine       | 7       |                |         |
| D-galactose            | 1       | glutamic acid   | 1       | control         | 2       | DOX             | 6       | L-Thyroxine       | 7       |                |         |
| D-glucose              | 1       | glycine         | 1       | serotonin       | 2       | DOX             | 6       | L-Tyrosine        | 7       |                |         |
| D-glucose              | 1       | glycine         | 1       | serotonin       | 2       | DOX             | 6       | L-Tyrosine        | 7       |                |         |
| D-glucose              | 1       | glycine         | 1       | serotonin       | 2       | Control         | 7       | L-Tyrosine        | 7       |                |         |
| D-glucose              | 1       | l-aspartic acid | 1       | b-estradiol     | 2       | Control         | 7       | Melatonin         | 7       |                |         |
| GABA                   | 1       |                 |         |                 |         |                 |         |                   |         |                |         |

# Corona: DNA CB4 (CCCCCCCCCAGGCGGGGCCCCCCC)

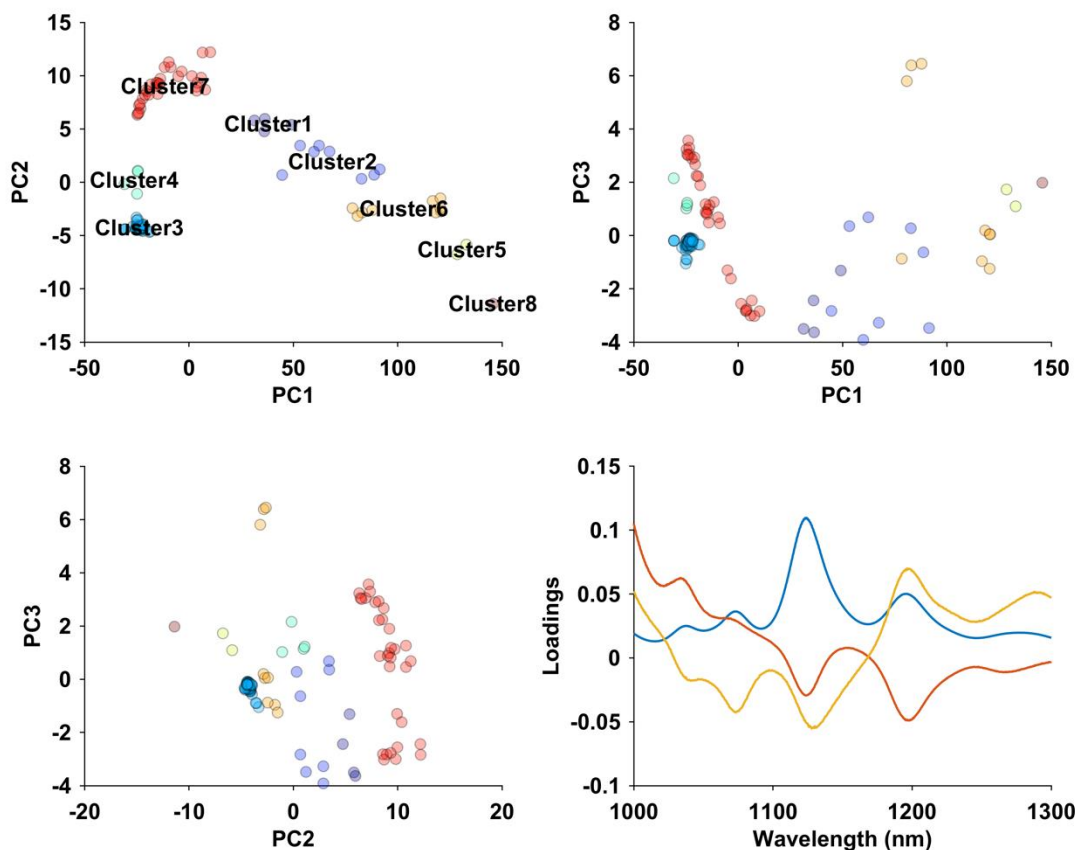

| Analyte                | Cluster | Analyte           | Cluster | Analyte           | Cluster | Analyte           | Cluster | Analyte        | Cluster |
|------------------------|---------|-------------------|---------|-------------------|---------|-------------------|---------|----------------|---------|
| L-Tyrosine             | 1       | Cytidine          | 3       | Homovanillic acid | 3       | Epinephrine       | 6       | L-Histidine    | 7       |
| Oxytocin               | 1       | D-Aspartic acid   | 3       | Homovanillic acid | 3       | Epinephrine       | 6       | L-Histidine    | 7       |
| Oxytocin               | 1       | D-Aspartic acid   | 3       | L-Citrulline      | 3       | Epinephrine       | 6       | L-Histidine    | 7       |
| Oxytocin               | 1       | D-Aspartic acid   | 3       | L-Citrulline      | 3       | L-Cysteine        | 6       | Norepinephrine | 7       |
| L-Tyrosine             | 2       | D-Fructose        | 3       | L-Citrulline      | 3       | L-Cysteine        | 6       | Norepinephrine | 7       |
| L-Tyrosine             | 2       | D-Fructose        | 3       | L-Dopa            | 3       | L-Cysteine        | 6       | Norepinephrine | 7       |
| Serotonin              | 2       | D-Fructose        | 3       | L-Dopa            | 3       | Melatonin         | 7       | Urea           | 7       |
| Serotonin              | 2       | D-Galactose       | 3       | L-Dopa            | 3       | Melatonin         | 7       | Urea           | 7       |
| Serotonin              | 2       | D-Galactose       | 3       | L-Phenylalanine   | 3       | Melatonin         | 7       | Urea           | 7       |
| NADH                   | 2       | D-Galactose       | 3       | L-Phenylalanine   | 3       | 17-beta-estradiol | 7       | Ascorbic acid  | 8       |
| NADH                   | 2       | D-Glucose         | 3       | L-Phenylalanine   | 3       | 17-beta-estradiol | 7       |                |         |
| NADH                   | 2       | D-Glucose         | 3       | L-Thyroxine       | 3       | 17-beta-estradiol | 7       |                |         |
| 2,4-dinitrophenol      | 3       | D-Glucose         | 3       | L-Thyroxine       | 3       | Ampicillin        | 7       |                |         |
| 2,4-dinitrophenol      | 3       | D-Mannitol        | 3       | L-Thyroxine       | 3       | Ampicillin        | 7       |                |         |
| 2,4-dinitrophenol      | 3       | D-Mannitol        | 3       | control           | 3       | Ampicillin        | 7       |                |         |
| Acetylcholine Chloride | 3       | D-Mannitol        | 3       | control           | 3       | Creatine          | 7       |                |         |
| Acetylcholine Chloride | 3       | D-Mannose         | 3       | control           | 3       | Creatine          | 7       |                |         |
| Acetylcholine Chloride | 3       | D-Mannose         | 3       | DOX               | 3       | Creatine          | 7       |                |         |
| Adenosine              | 3       | D-Mannose         | 3       | DOX               | 3       | DOPAC (control)   | 7       |                |         |
| Adenosine              | 3       | GABA              | 3       | DOX               | 3       | DOPAC (control)   | 7       |                |         |
| Adenosine              | 3       | GABA              | 3       | Riboflavin        | 4       | DOPAC (control)   | 7       |                |         |
| ATP                    | 3       | GABA              | 3       | Riboflavin        | 4       | Glutamic acid     | 7       |                |         |
| ATP                    | 3       | Guanosine         | 3       | Riboflavin        | 4       | Glutamic acid     | 7       |                |         |
| ATP                    | 3       | Guanosine         | 3       | Glutamic acid     | 4       | Glycine           | 7       |                |         |
| cAMP                   | 3       | Guanosine         | 3       | Ascorbic acid     | 5       | Glycine           | 7       |                |         |
| cAMP                   | 3       | Histamine         | 3       | Ascorbic acid     | 5       | Glycine           | 7       |                |         |
| cAMP                   | 3       | Histamine         | 3       | Dopamine          | 6       | L-Aspartic acid   | 7       |                |         |
| Cytidine               | 3       | Histamine         | 3       | Dopamine          | 6       | L-Aspartic acid   | 7       |                |         |
| Cytidine               | 3       | Homovanillic acid | 3       | Dopamine          | 6       | L-Aspartic acid   | 7       |                |         |

# Corona: DNA CB3 (CCCCCCCCCTCCGCAAGTCCCCCCC)

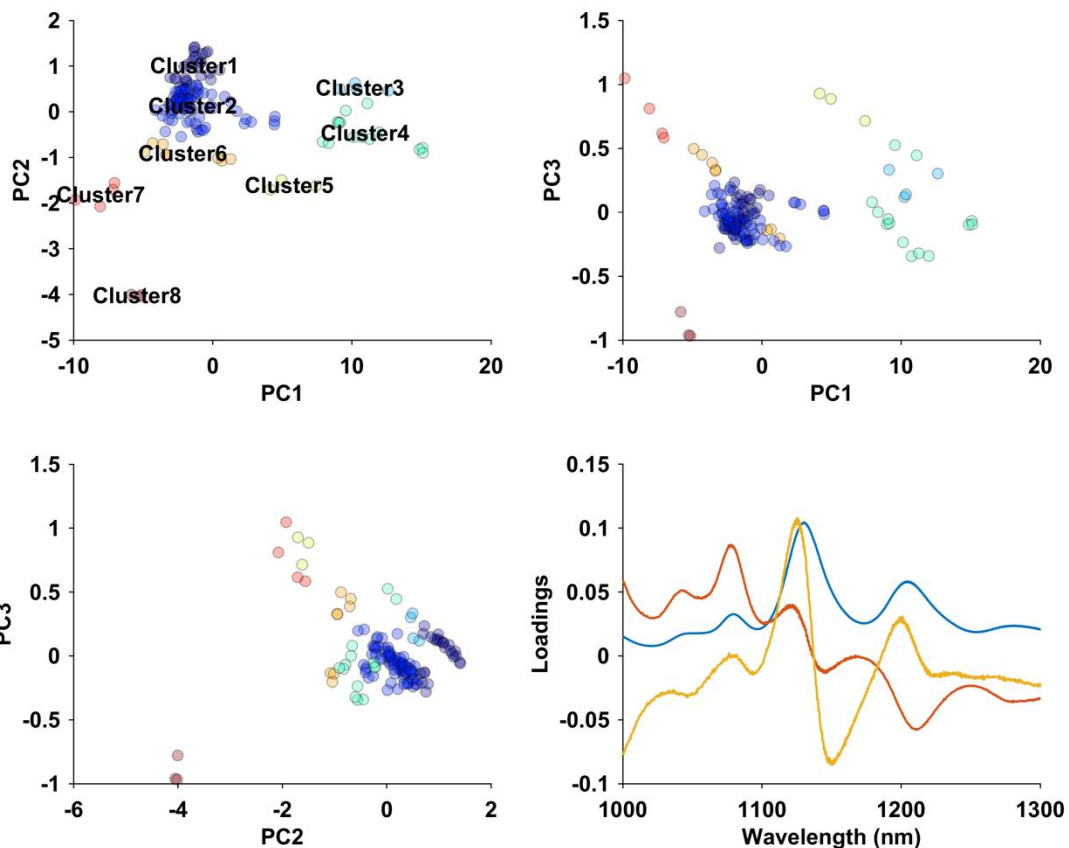

| Analyte           | Cluster | Analyte           | Cluster | Analyte           | Cluster | Analyte       | Cluster | Analyte        | Cluster |
|-------------------|---------|-------------------|---------|-------------------|---------|---------------|---------|----------------|---------|
| GABA              | 1       | 2,4 dinitrophenol | 2       | adenosine         | 2       | Serotonin     | 2       | Ascorbic acid  | 4       |
| Glutamic acid     | 1       | 2,4 dinitrophenol | 2       | adenosine         | 2       | Oxytocin      | 2       | Ascorbic acid  | 4       |
| Control           | 1       | acetylcholine     | 2       | D-mannitol        | 2       | Oxytocin      | 2       | Epinephrine    | 4       |
| Control           | 1       | acetylcholine     | 2       | D-mannitol        | 2       | Oxytocin      | 2       | Epinephrine    | 4       |
| Control           | 1       | acetylcholine     | 2       | D-mannitol        | 2       | Estradiol     | 2       | Cysteine       | 4       |
| Glycine           | 1       | ATP               | 2       | D-mannose         | 2       | Estradiol     | 2       | Cysteine       | 4       |
| Glycine           | 1       | ATP               | 2       | D-mannose         | 2       | Estradiol     | 2       | Cysteine       | 4       |
| AMP               | 1       | ATP               | 2       | D-mannose         | 2       | Ampicillin    | 2       | Norepinephrine | 5       |
| AMP               | 1       | cAMP              | 2       | Histamine         | 2       | Ampicillin    | 2       | Norepinephrine | 5       |
| AMP               | 1       | cAMP              | 2       | Histamine         | 2       | Ampicillin    | 2       | Norepinephrine | 5       |
| CMP               | 1       | cAMP              | 2       | Histamine         | 2       | Creatine      | 2       | Guanosine      | 6       |
| CMP               | 1       | cytidine          | 2       | control           | 2       | Creatine      | 2       | Guanosine      | 6       |
| CMP               | 1       | cytidine          | 2       | control           | 2       | Creatine      | 2       | Guanosine      | 6       |
| GMP               | 1       | cytidine          | 2       | control           | 2       | Glutamic acid | 2       | L-thyroxine    | 6       |
| GMP               | 1       | D-aspartic acid   | 2       | Homovanillic acid | 2       | Glycine       | 2       | L-thyroxine    | 6       |
| GMP               | 1       | D-aspartic acid   | 2       | Homovanillic acid | 2       | NADH          | 2       | L-tyrosine     | 6       |
| TMP               | 1       | D-aspartic acid   | 2       | Homovanillic acid | 2       | NADH          | 2       | L-tyrosine     | 6       |
| TMP               | 1       | D-fructose        | 2       | L-citruline       | 2       | NADH          | 2       | L-tyrosine     | 6       |
| TMP               | 1       | D-fructose        | 2       | L-citruline       | 2       | Epinephrine   | 3       | Riboflavin     | 7       |
| Aspartic acid     | 1       | D-fructose        | 2       | L-citruline       | 2       | Dopamine      | 2       | Riboflavin     | 7       |
| Aspartic acid     | 1       | D-galactose       | 2       | L-phenylalanine   | 2       | Dopamine      | 2       | Riboflavin     | 7       |
| Aspartic acid     | 1       | D-galactose       | 2       | L-phenylalanine   | 2       | Dopamine      | 2       | Glutamic acid  | 7       |
| Histamine         | 1       | D-galactose       | 2       | L-phenylalanine   | 2       | dopamine      | 4       | DOX            | 8       |
| Histamine         | 1       | D-glucose         | 2       | L-thyroxine       | 2       | dopamine      | 4       | DOX            | 8       |
| Histamine         | 1       | D-glucose         | 2       | Melatonin         | 2       | dopamine      | 4       | DOX            | 8       |
| control           | 2       | D-glucose         | 2       | Melatonin         | 2       | L-DOPA        | 4       |                |         |
| control           | 2       | GABA              | 2       | Melatonin         | 2       | L-DOPA        | 4       |                |         |
| control           | 2       | GABA              | 2       | Serotonin         | 2       | L-DOPA        | 4       |                |         |
| 2,4 dinitrophenol | 2       | adenosine         | 2       | Serotonin         | 2       | Ascorbic acid | 4       |                |         |

**Figure S3.** Hierarchical clustering dendrograms generated using different distance metrics for library data acquired for the DNA-wrapped SWNT nanosensors. Analytes contained within each cluster are listed in “SI\_File3\_dendrograms.zip”. A full dendrogram using weighted linkages and cosine distance is displayed alongside a heatmap of the fluorescence emission spectrum for all samples with 990-1340 nm emission indicated by the horizontal axis. Sample IDs can be found in the file “SI\_File2\_sample-IDs.xlsx”. Dendrogram colors indicate a group nodes whose linkage is less than 3.

**Corona: DNA (TTA)<sub>4</sub>TT**

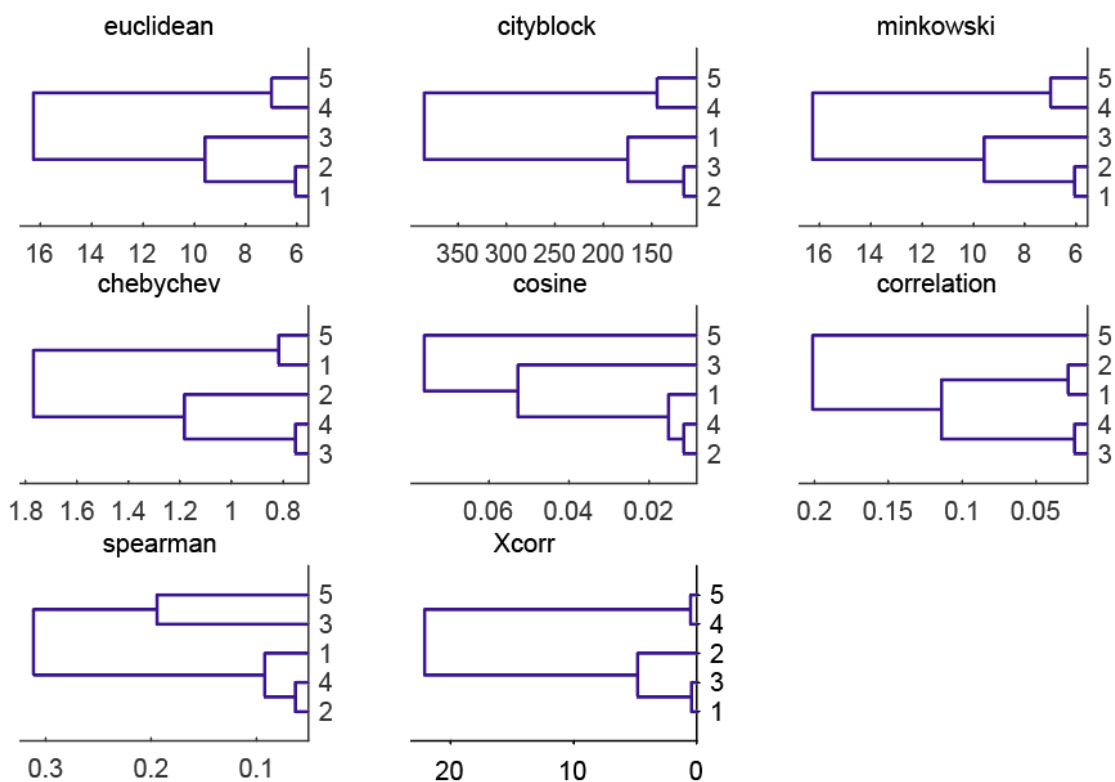

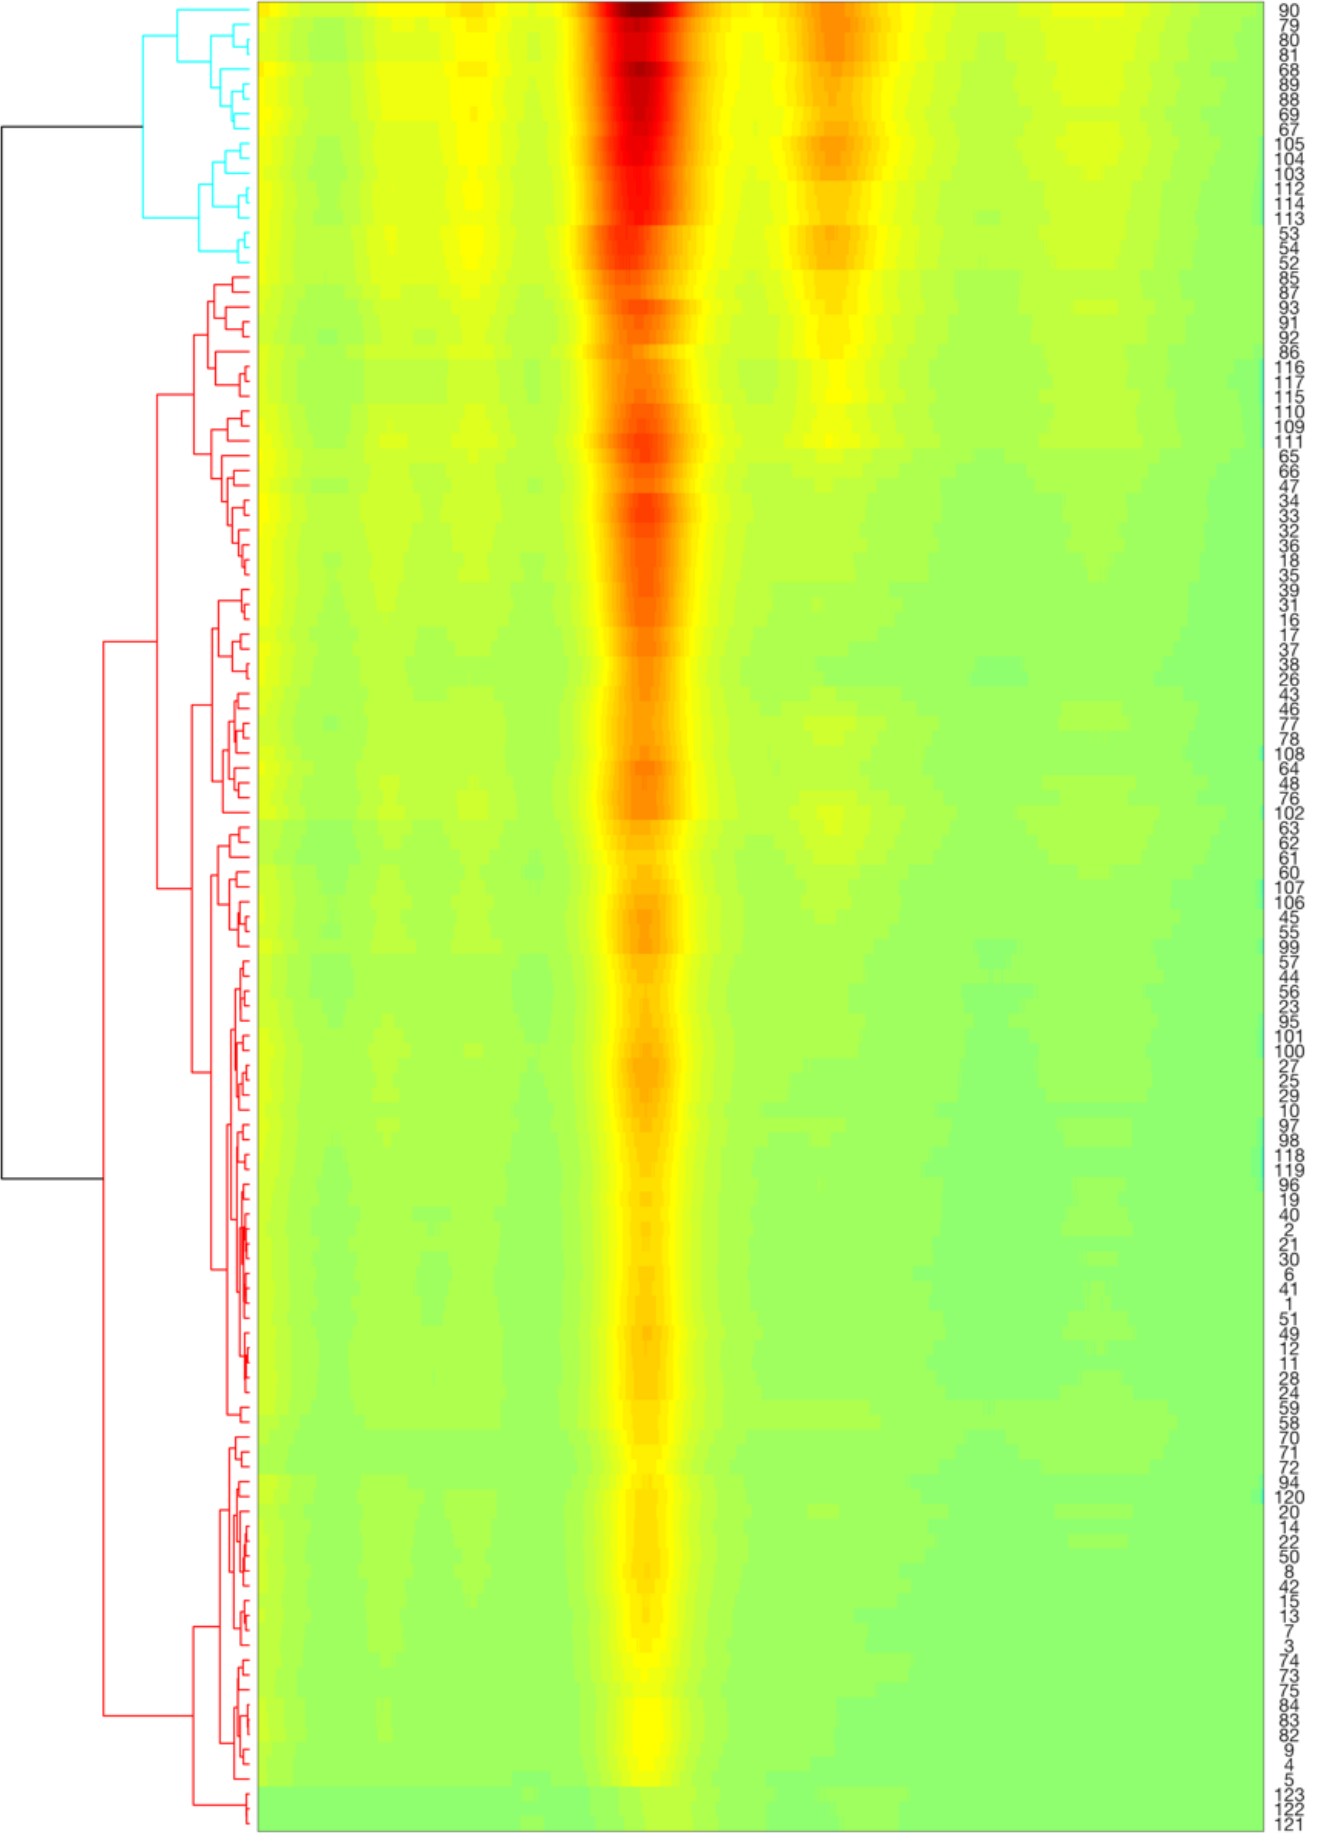

# Corona: DNA (TAT)<sub>4</sub>

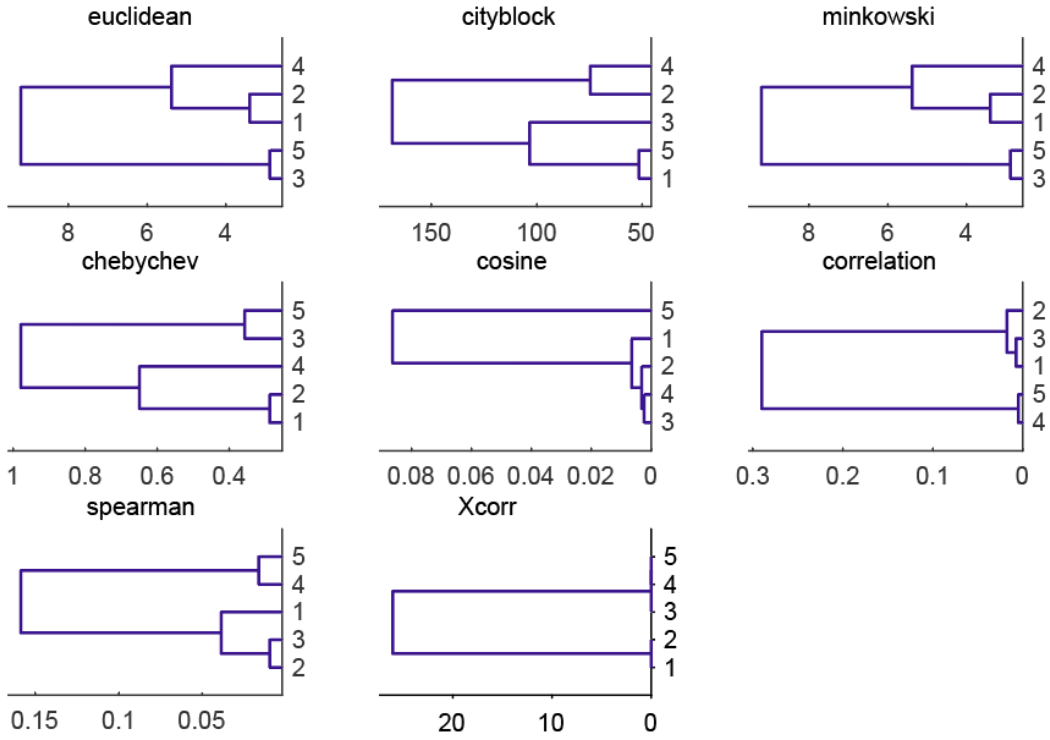

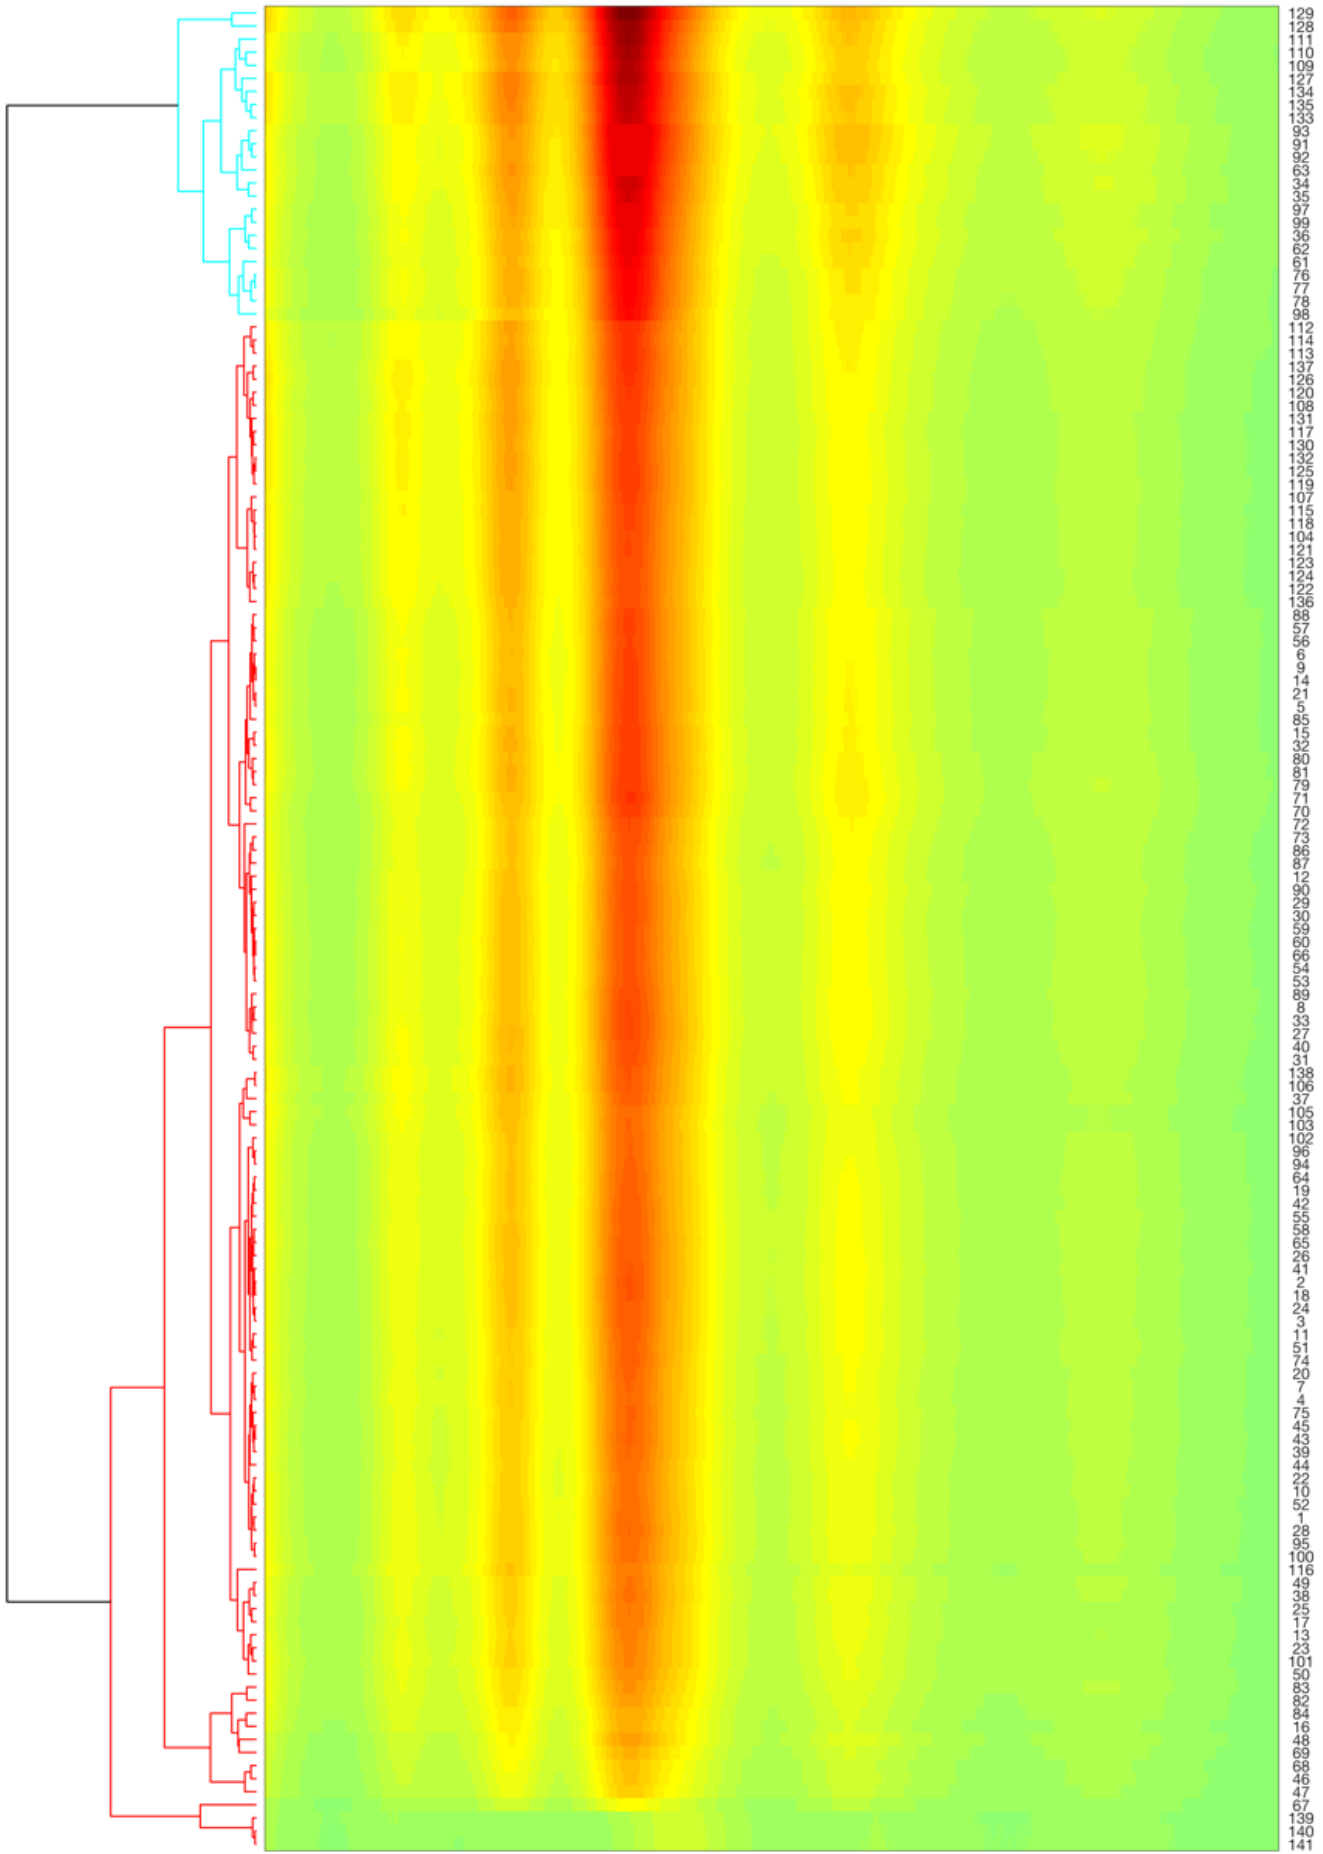

129  
128  
111  
110  
109  
127  
134  
135  
133  
93  
91  
92  
63  
34  
35  
97  
99  
36  
62  
61  
76  
77  
78  
98  
112  
114  
113  
137  
26  
120  
108  
131  
117  
130  
132  
125  
119  
107  
115  
118  
104  
121  
123  
124  
122  
136  
88  
57  
56  
6  
14  
21  
5  
85  
15  
32  
80  
81  
79  
71  
70  
72  
73  
86  
87  
12  
90  
28  
30  
59  
60  
66  
54  
53  
89  
8  
33  
27  
40  
31  
138  
106  
37  
105  
103  
102  
96  
94  
64  
19  
42  
55  
55  
26  
41  
2  
18  
24  
3  
11  
51  
74  
20  
7  
4  
75  
45  
43  
39  
44  
22  
10  
52  
1  
28  
95  
100  
116  
49  
38  
25  
17  
13  
23  
101  
50  
83  
82  
84  
46  
48  
69  
68  
46  
47  
67  
139  
140  
141



# Corona: RITC-PEG-RITC

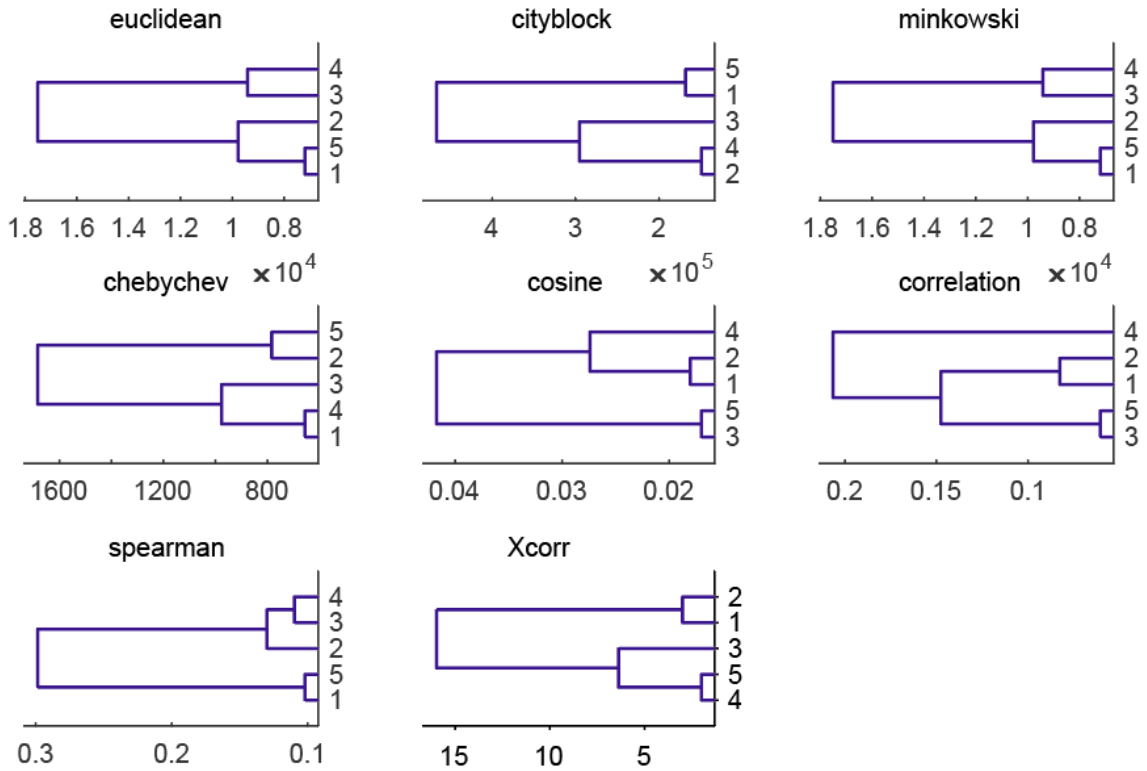

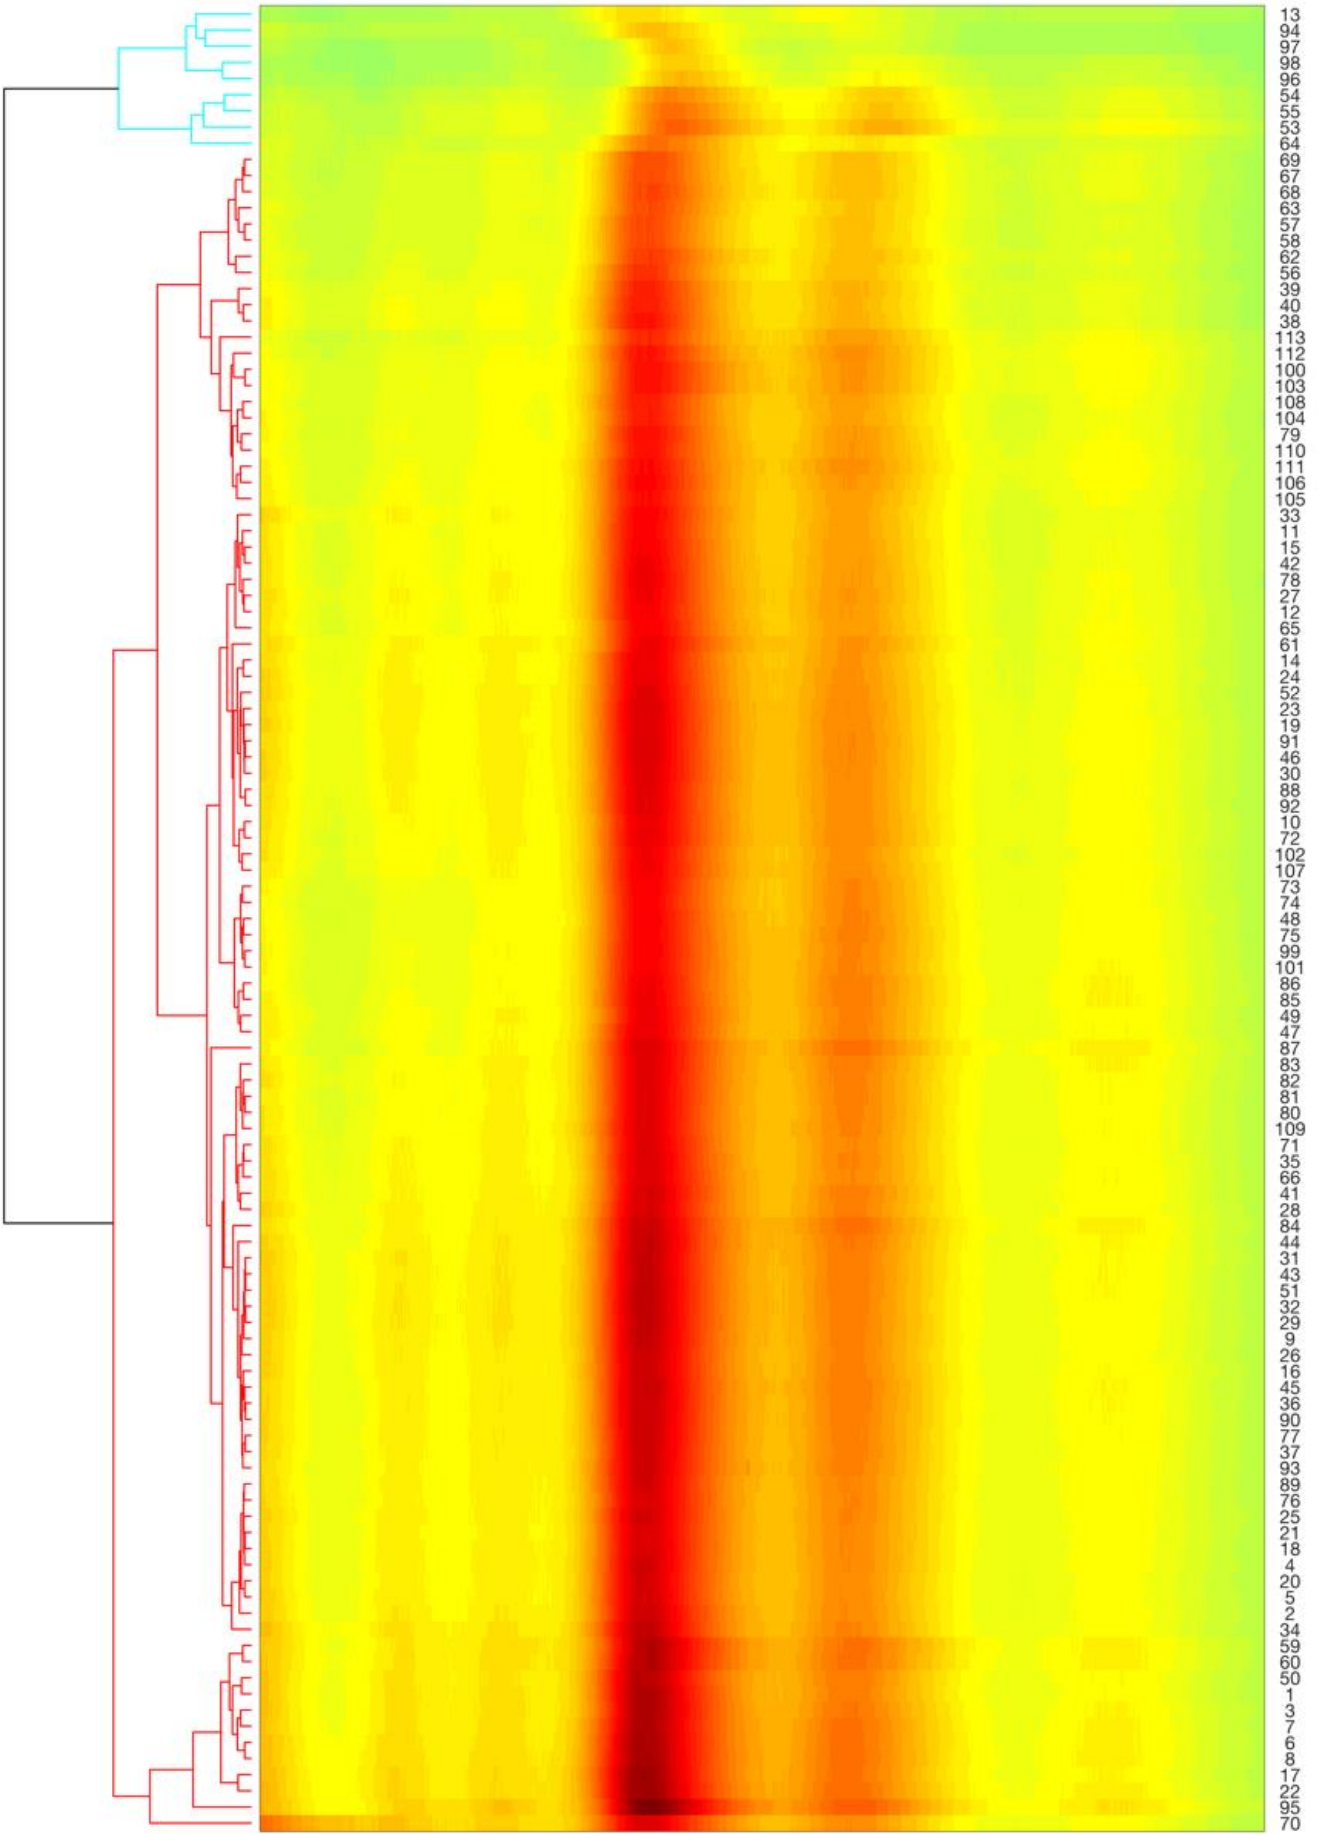

**Corona: DNA (GT)<sub>15</sub>**

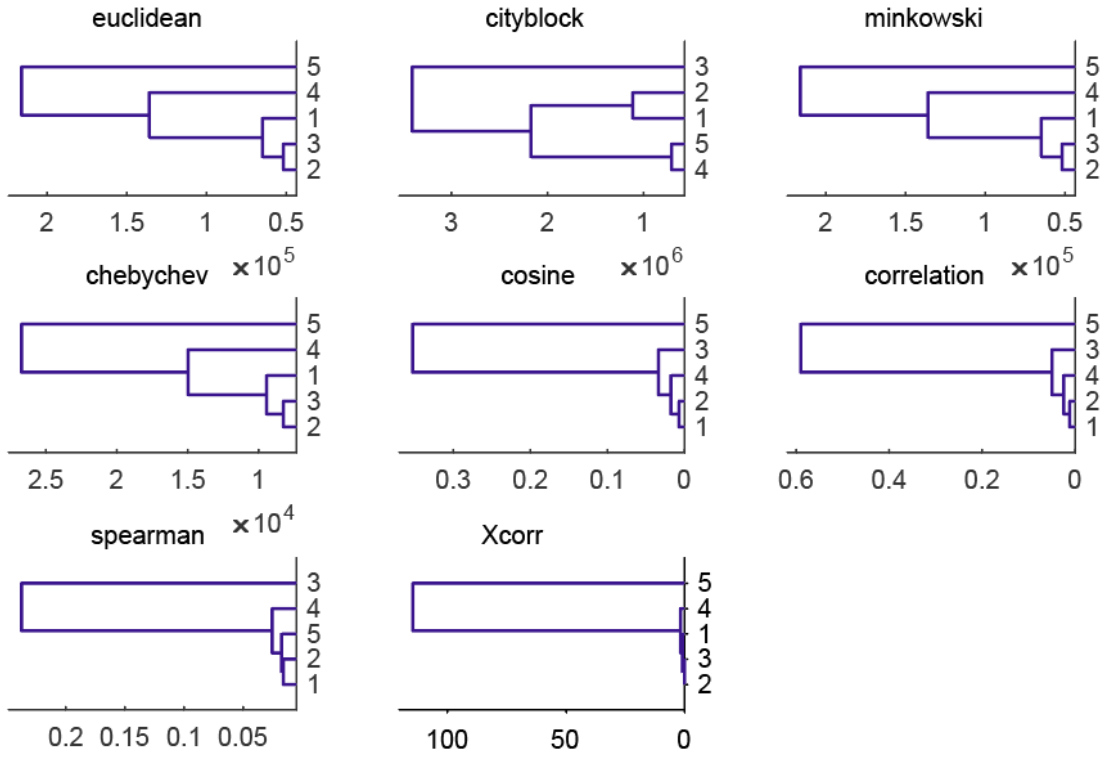

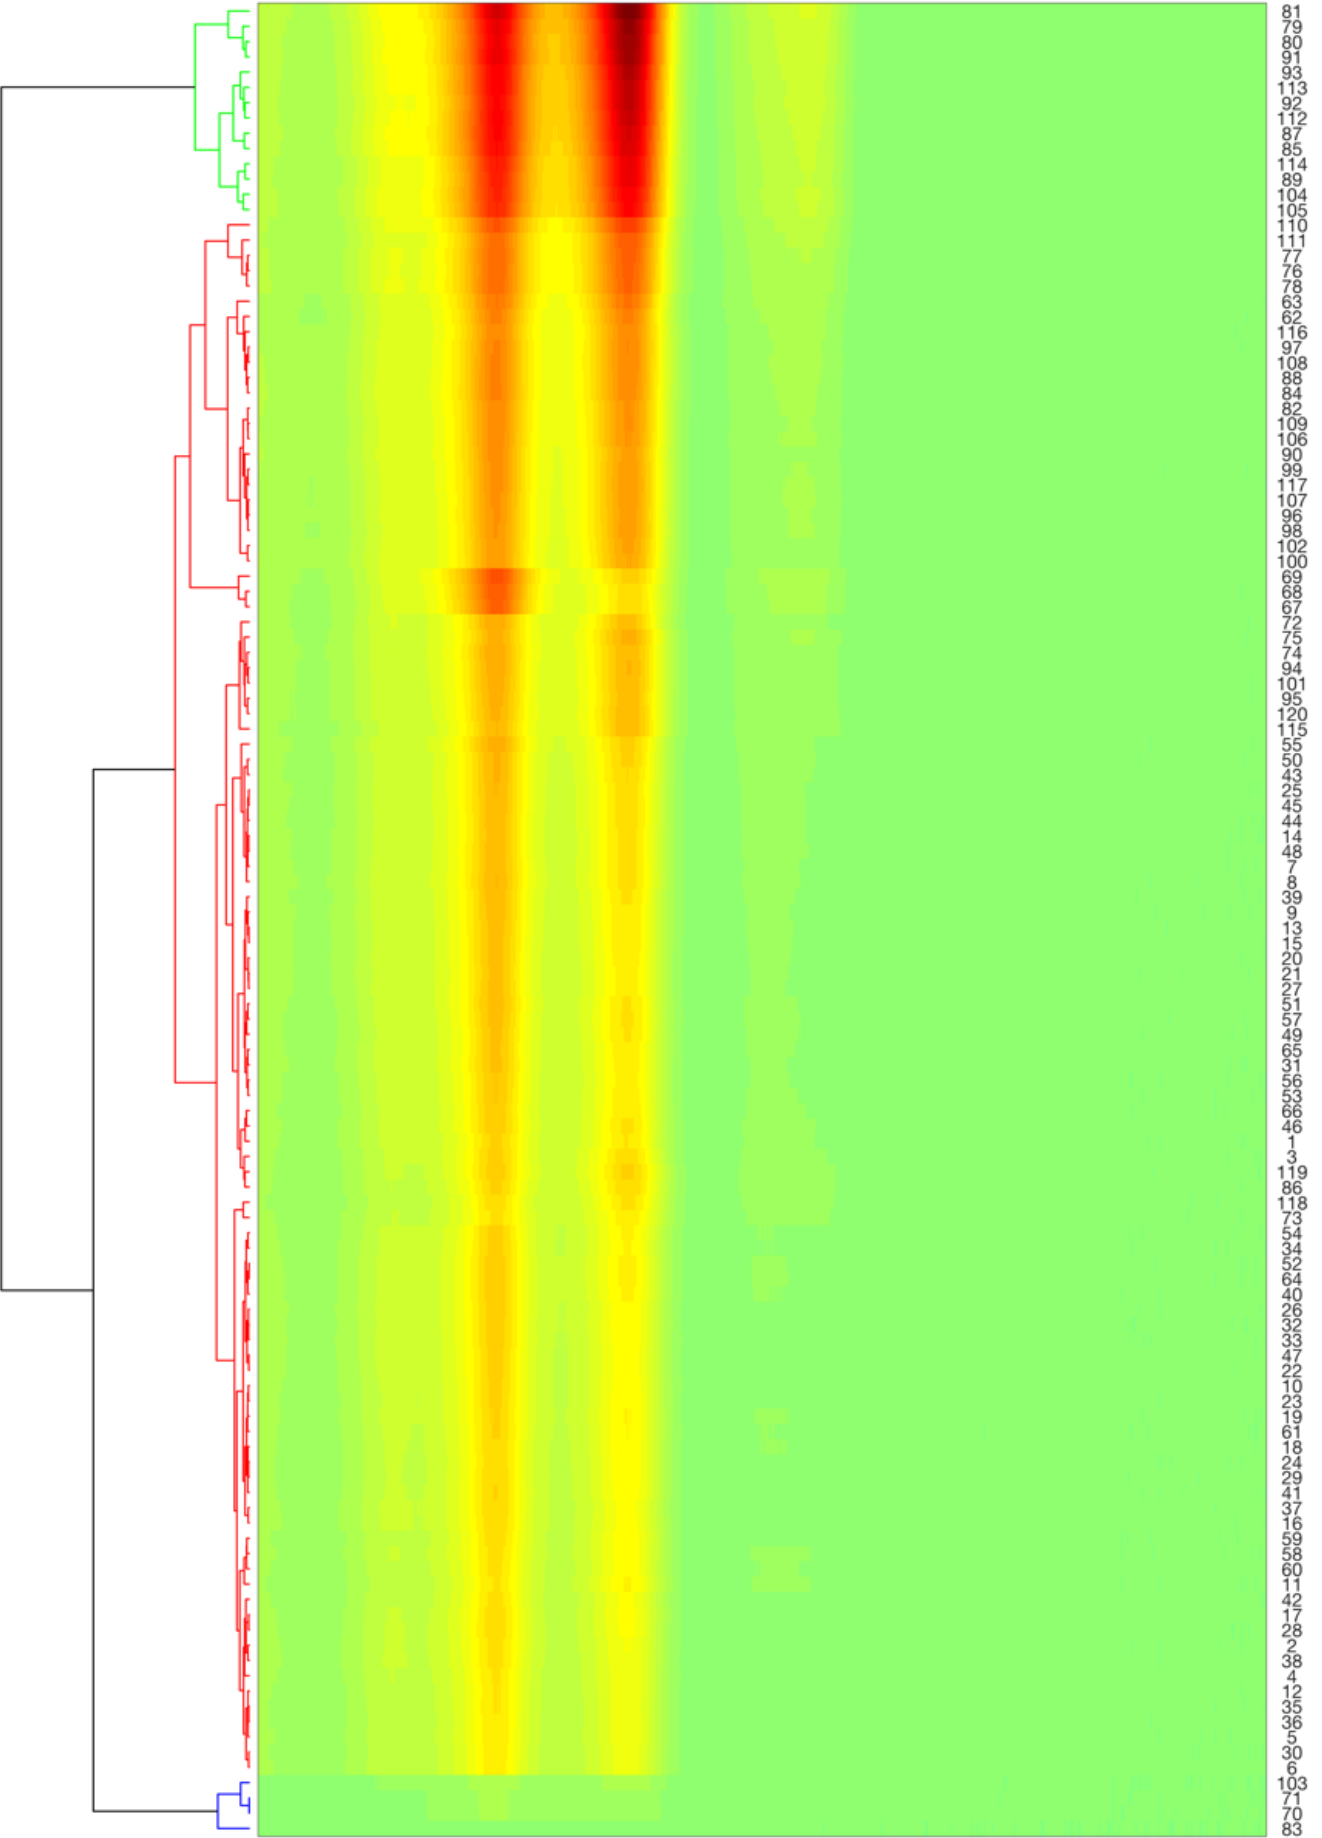

**Corona: DNA GTAGTCGAGTGTGTGTGTGTGT**

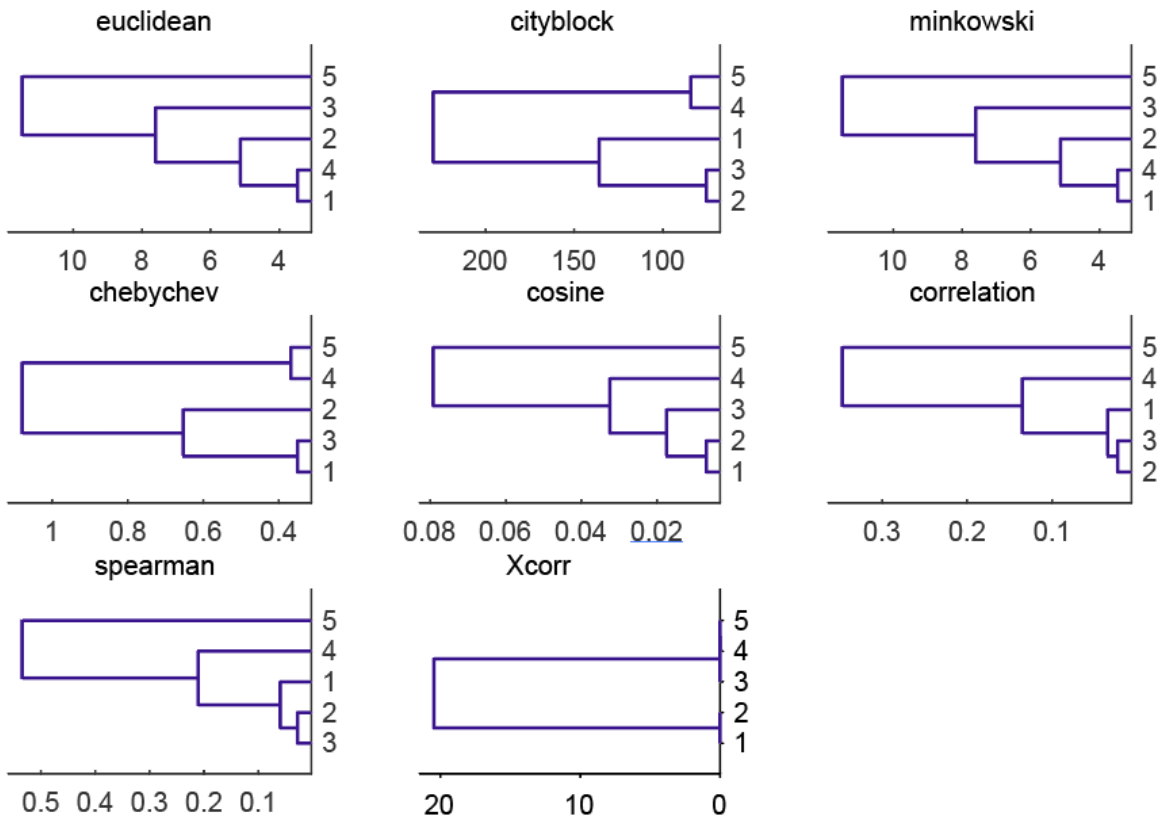

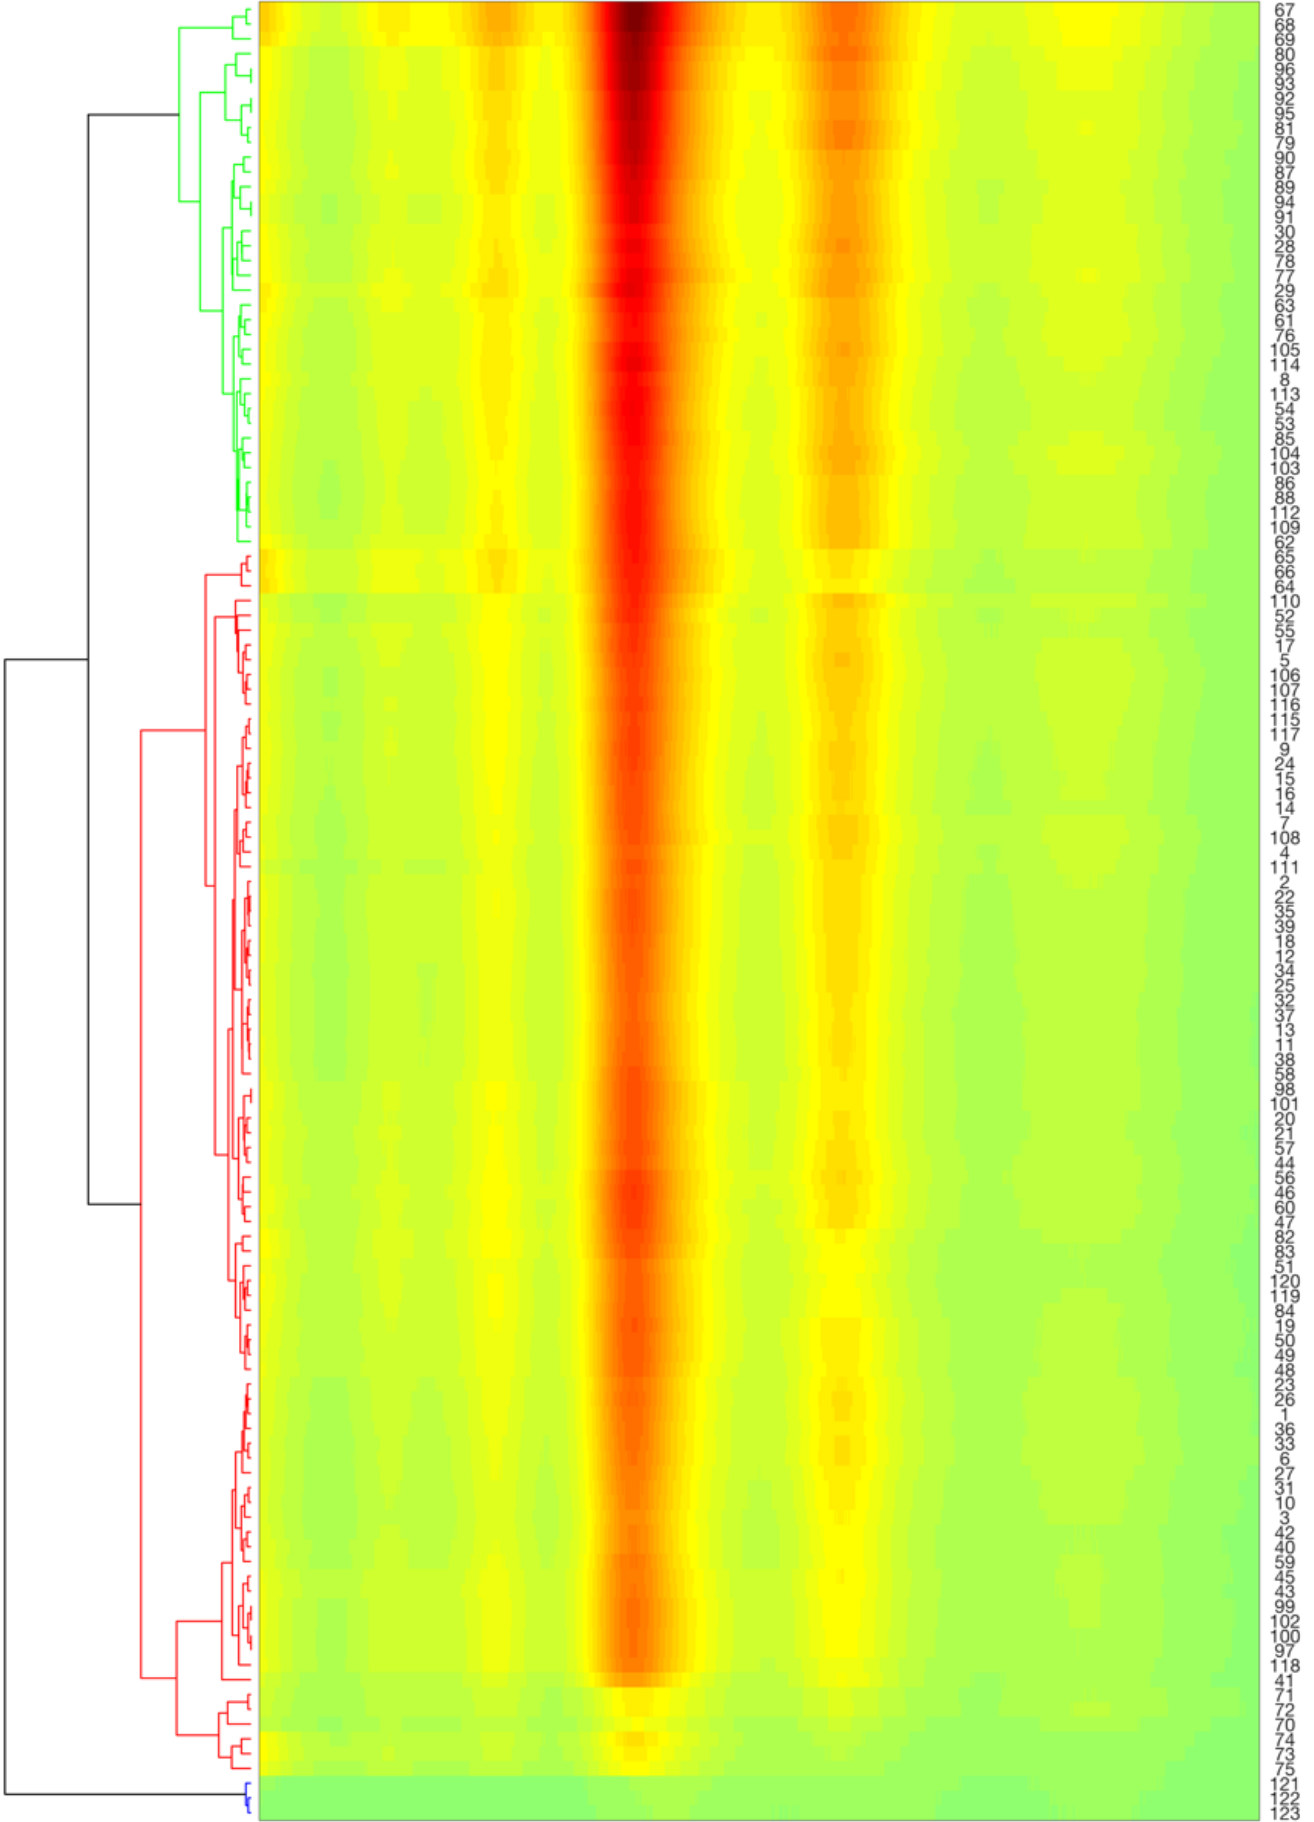

### Corona: Phospholipid DTTE-PEG2k

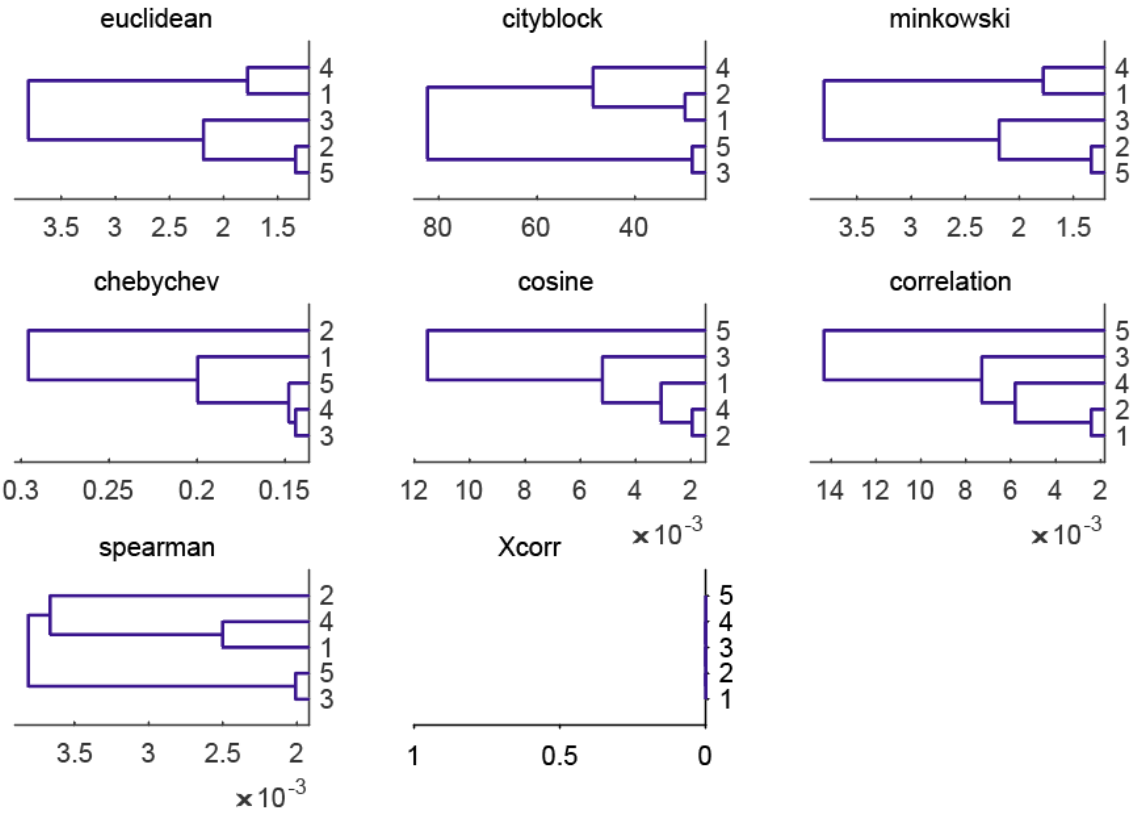





**Corona: DNA (CCA)<sub>10</sub>**

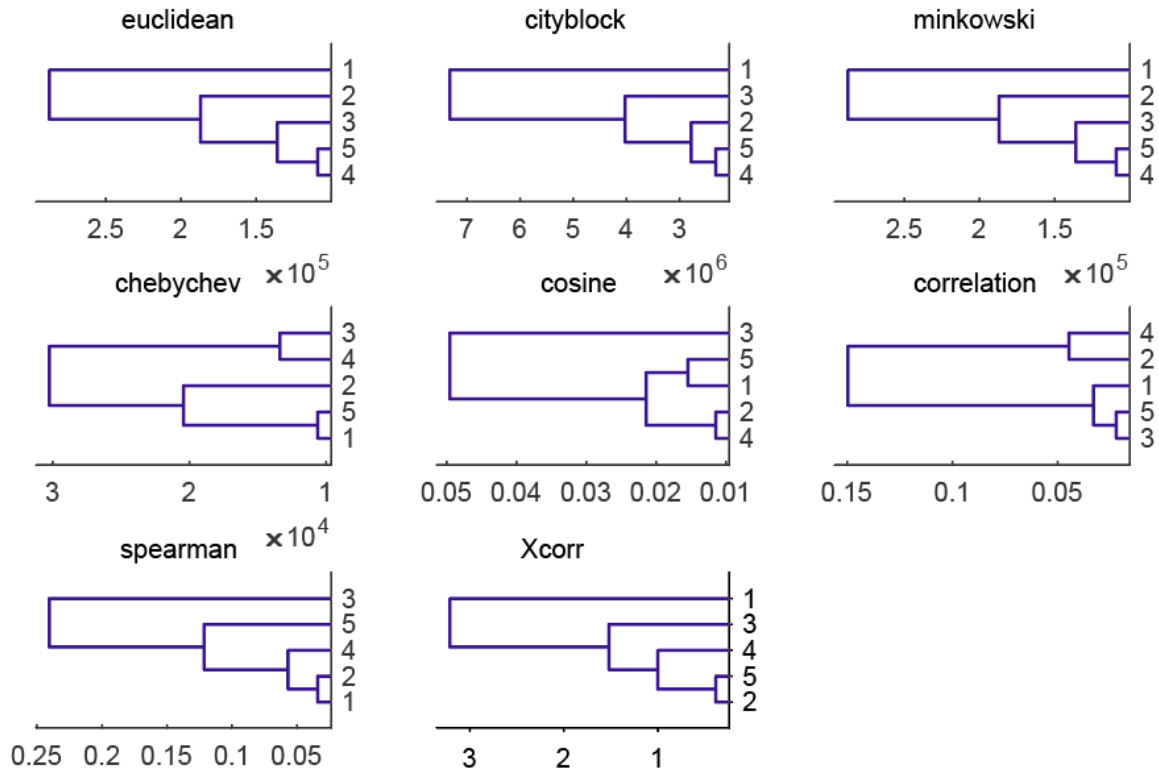

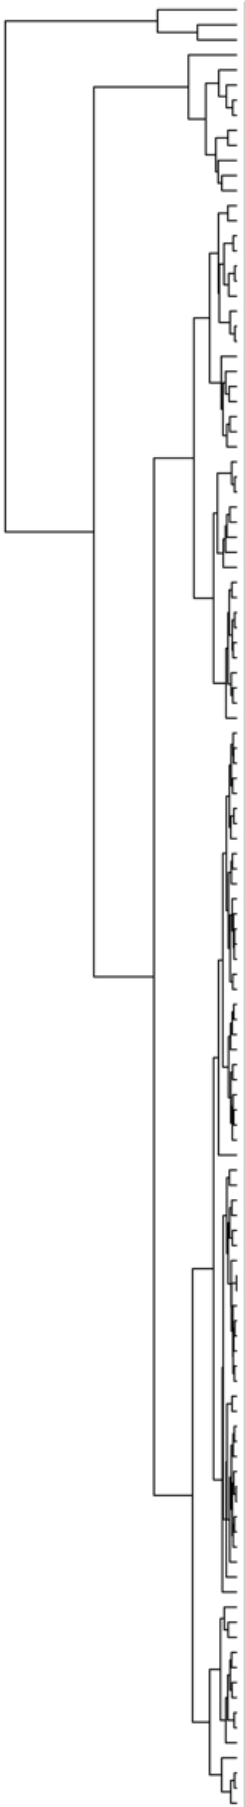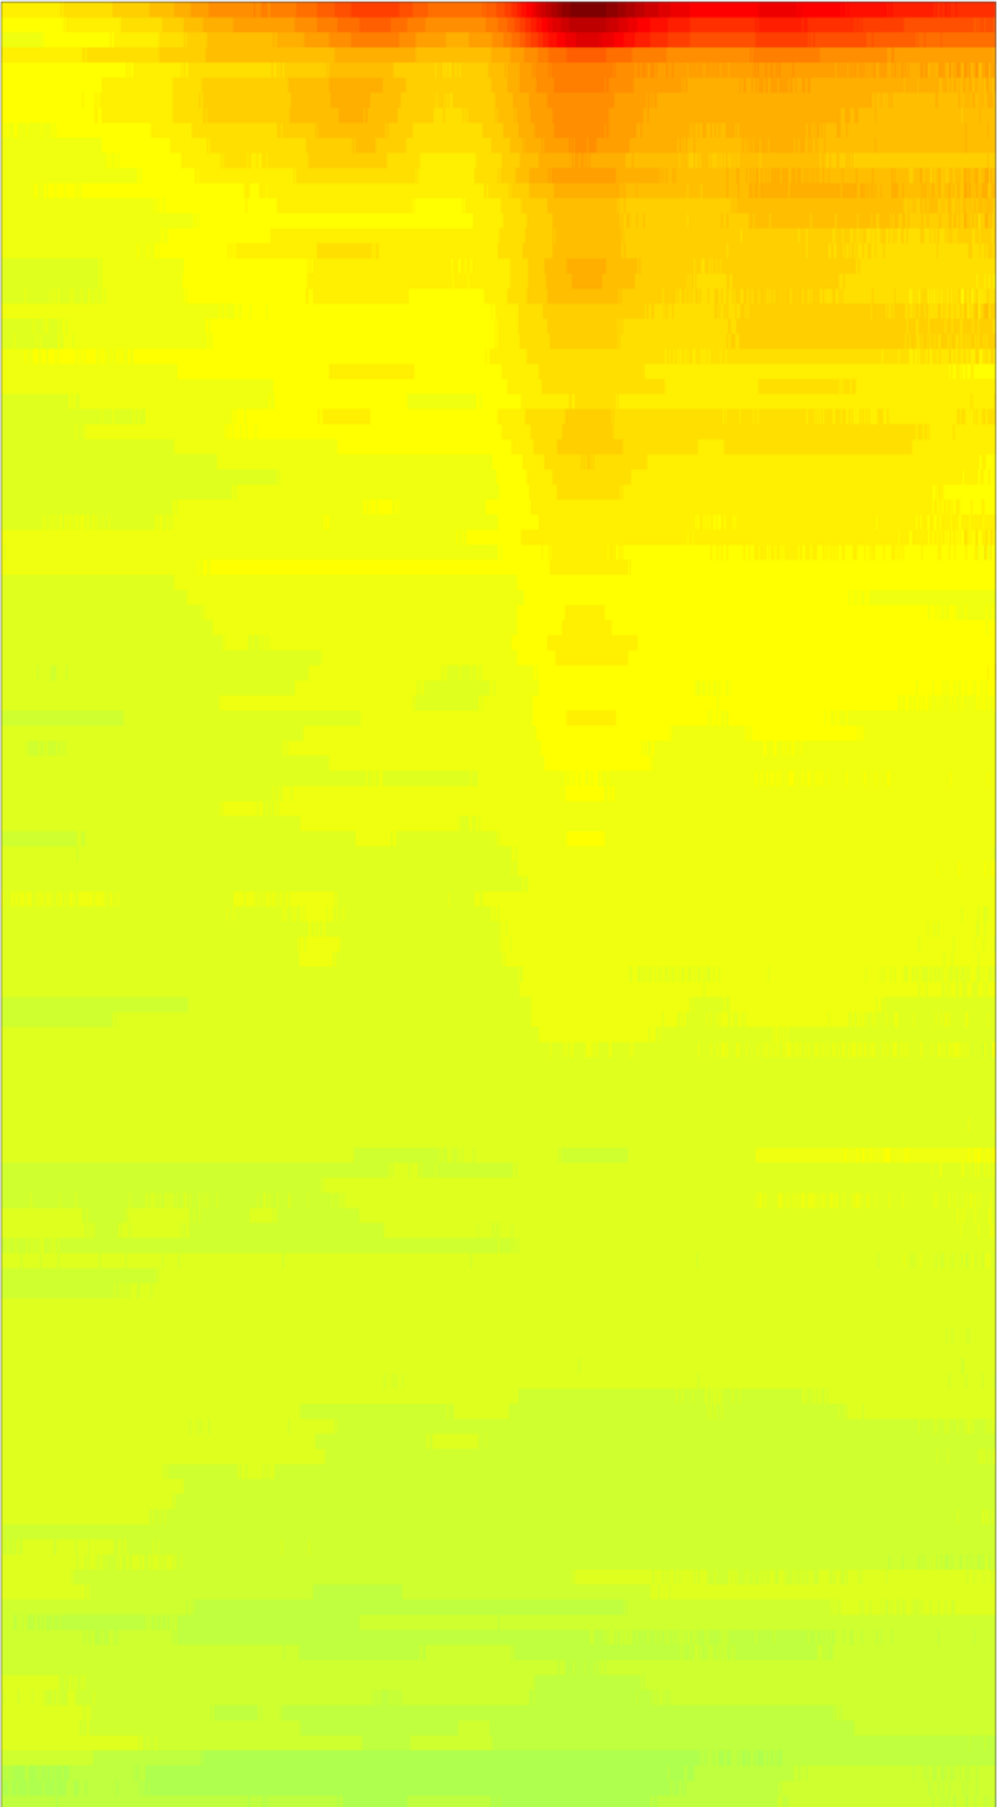

- 54
- 55
- 48
- 114
- 93
- 88
- 89
- 92
- 91
- 90
- 113
- 117
- 105
- 116
- 80
- 81
- 47
- 46
- 112
- 115
- 103
- 104
- 3
- 31
- 18
- 85
- 79
- 43
- 12
- 10
- 11
- 15
- 45
- 86
- 2
- 1
- 44
- 25
- 4
- 56
- 16
- 19
- 20
- 67
- 69
- 87
- 6
- 21
- 49
- 5
- 108
- 36
- 30
- 30
- 55
- 106
- 107
- 102
- 66
- 110
- 111
- 78
- 76
- 109
- 77
- 24
- 34
- 9
- 120
- 28
- 28
- 25
- 98
- 64
- 57
- 68
- 61
- 35
- 100
- 62
- 75
- 101
- 119
- 23
- 27
- 13
- 17
- 99
- 96
- 97
- 65
- 42
- 50
- 95
- 8
- 8
- 82
- 40
- 7
- 14
- 38
- 33
- 94
- 118
- 74
- 59
- 60
- 63
- 73
- 32
- 37
- 41
- 84
- 51
- 39
- 83
- 58
- 70
- 71
- 72

**Corona: DNA CB14 (CCCCCCCACCGGCGTTTCCCCCCC)**

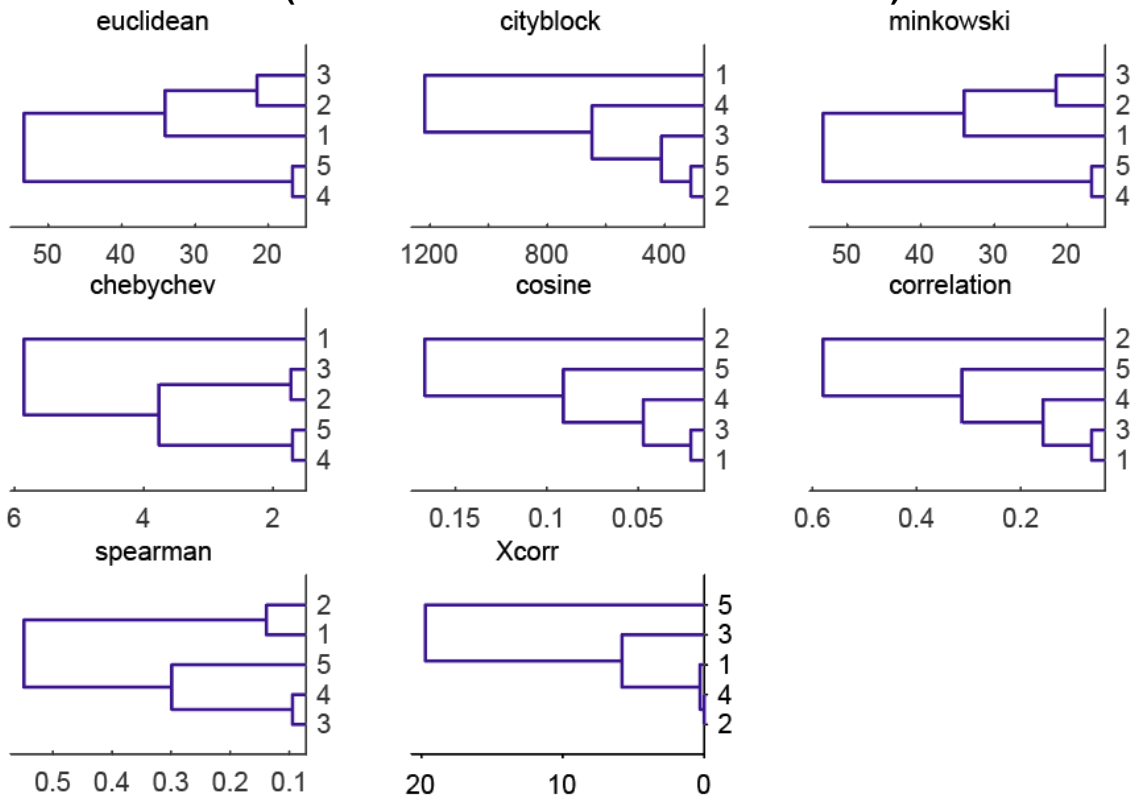

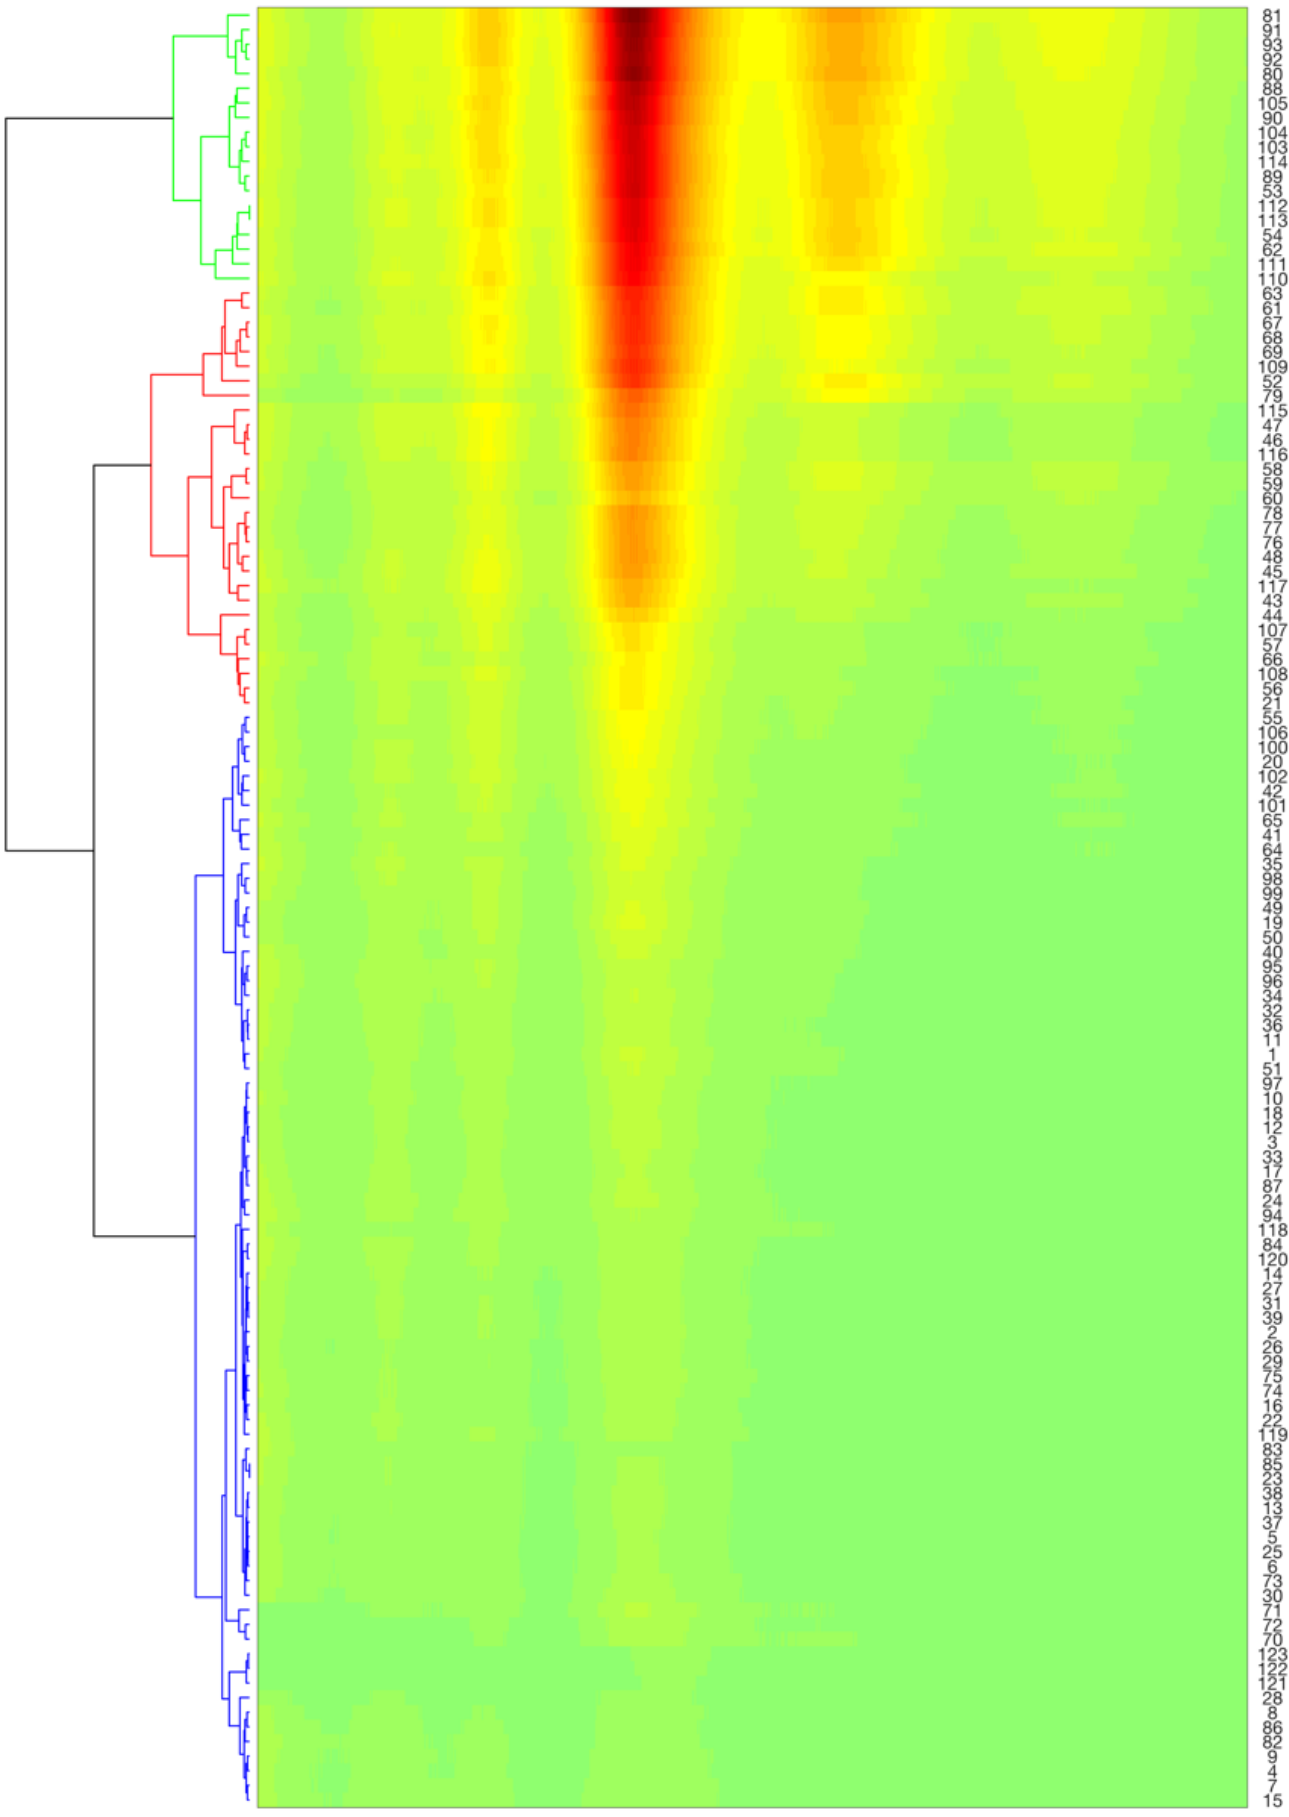

**Corona: DNA CB13 (CCCCCCCAGAATTACTTCCCCCCC)**

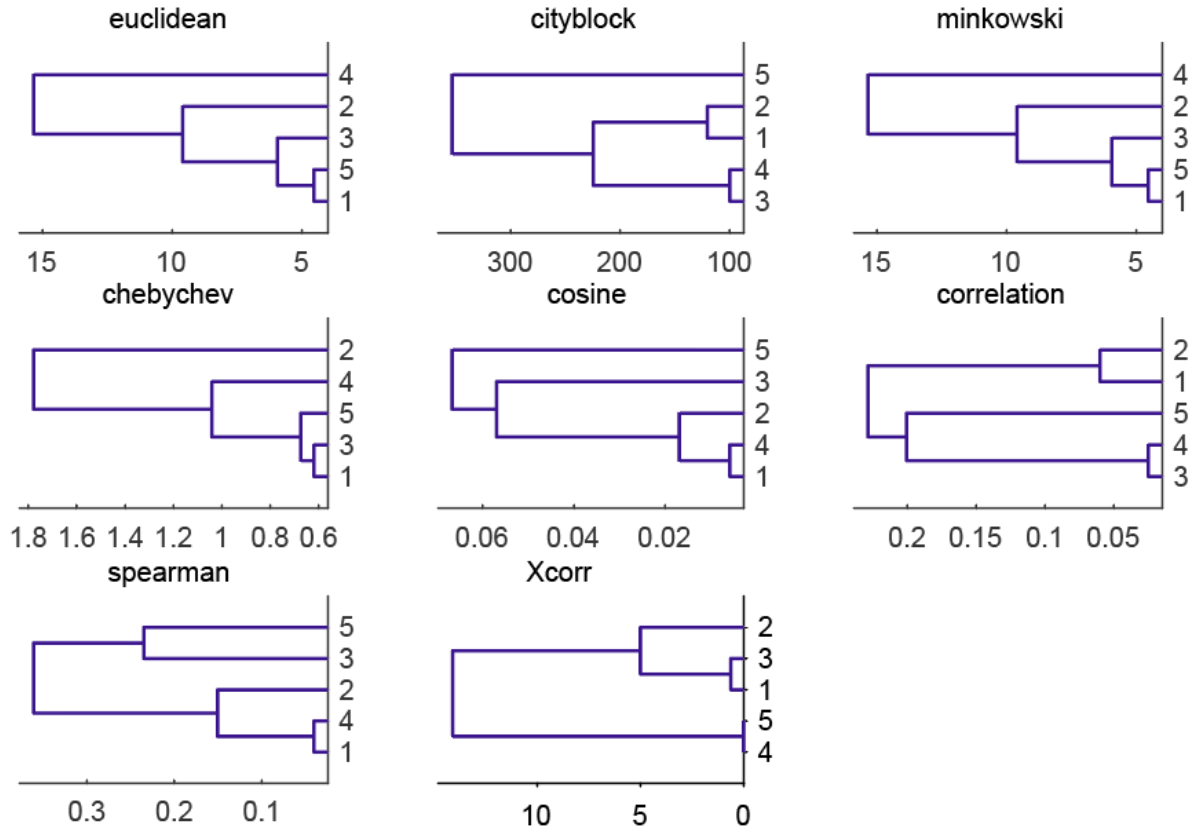





**Corona: DNA CB4 (CCCCCCCCCAGGCGGGGCCCCCCC)**

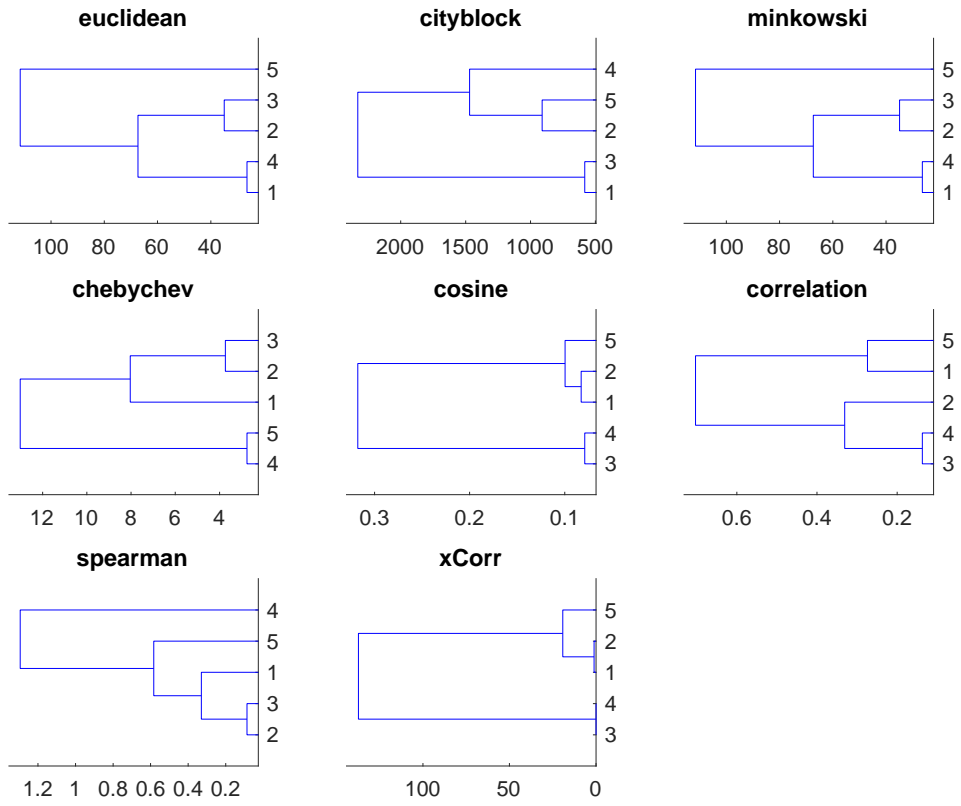



**Corona: DNA CB3 (CCCCCCCCTCCGCAAGTCCCCCCC)**

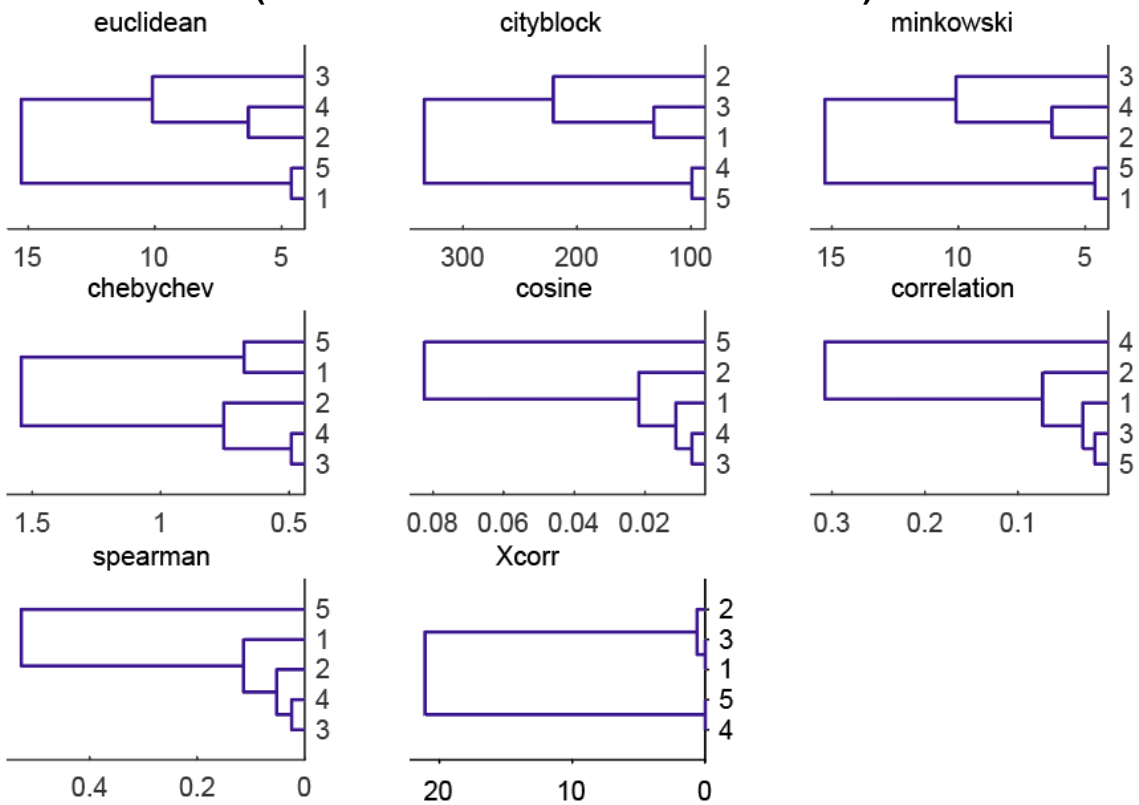

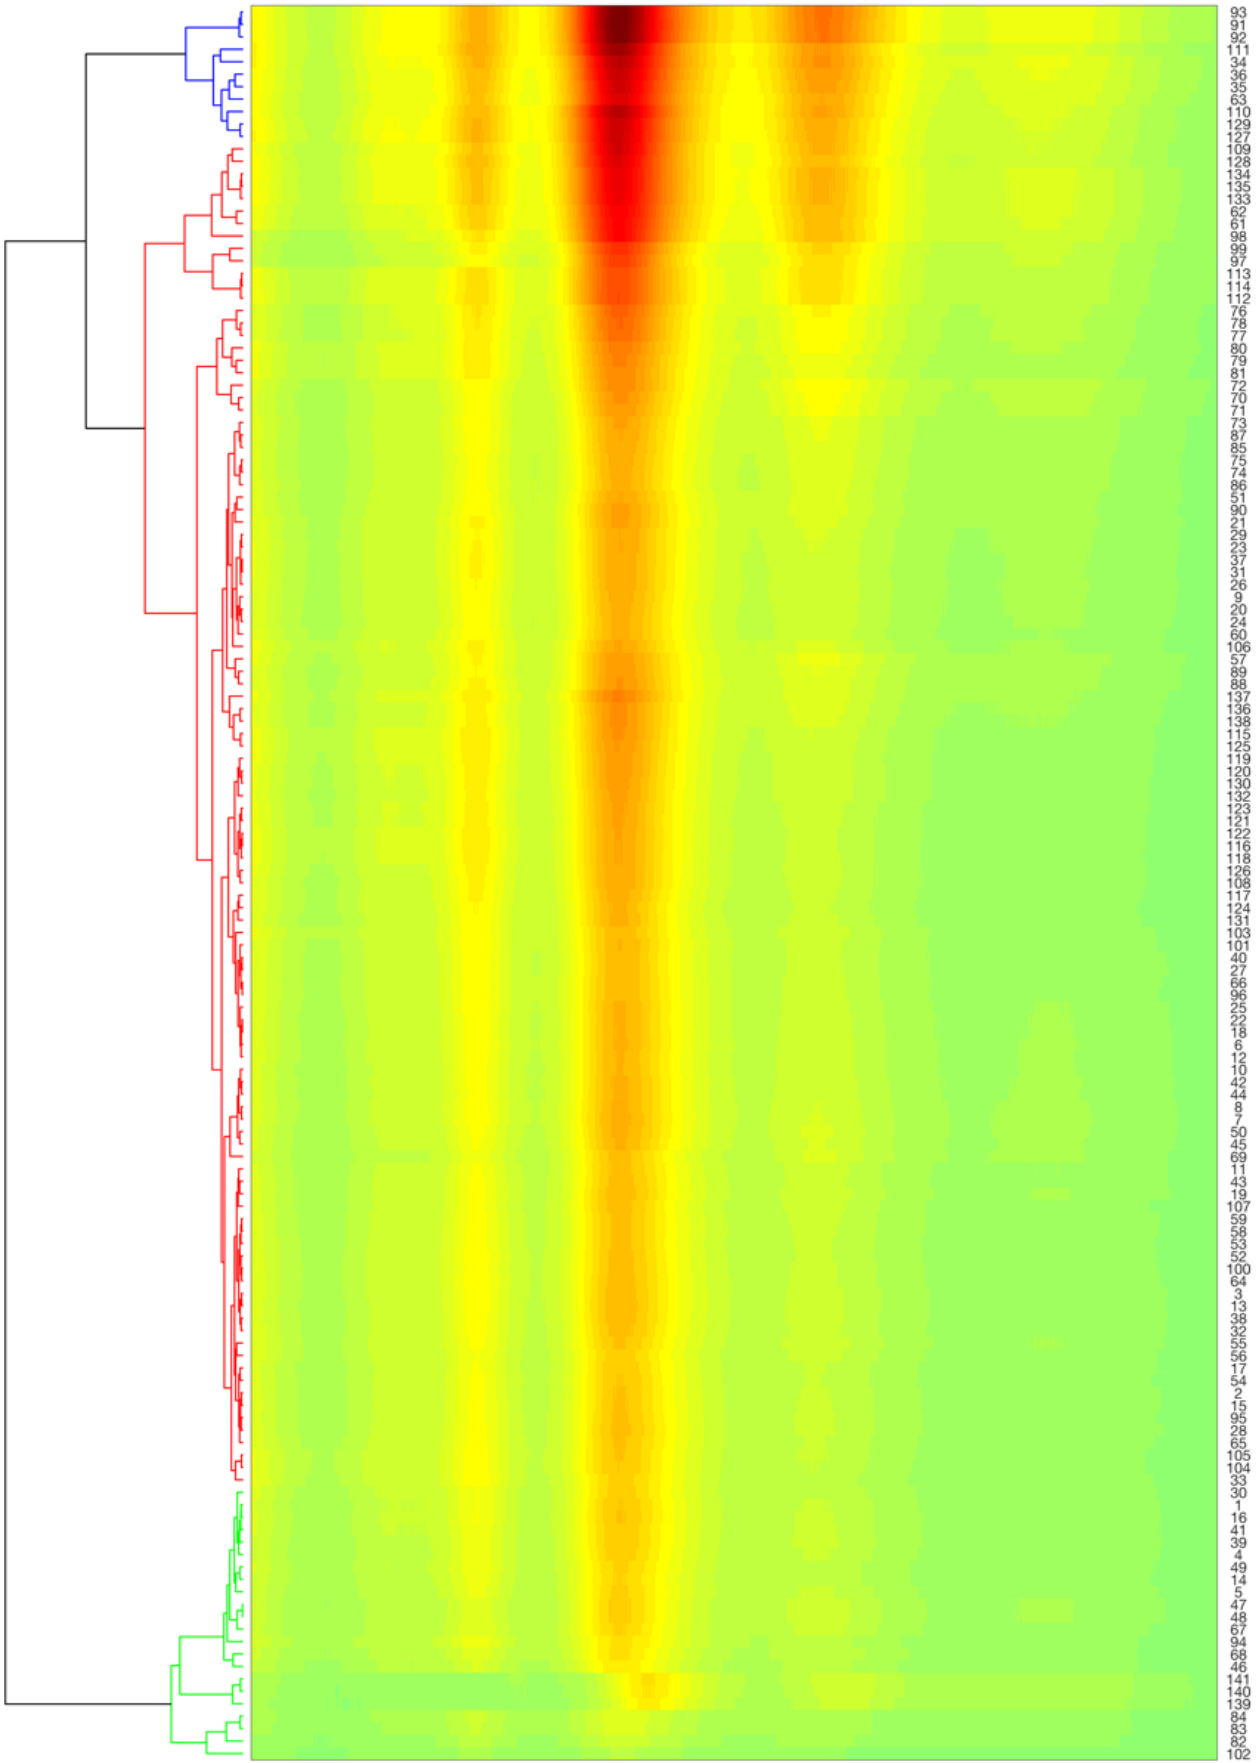

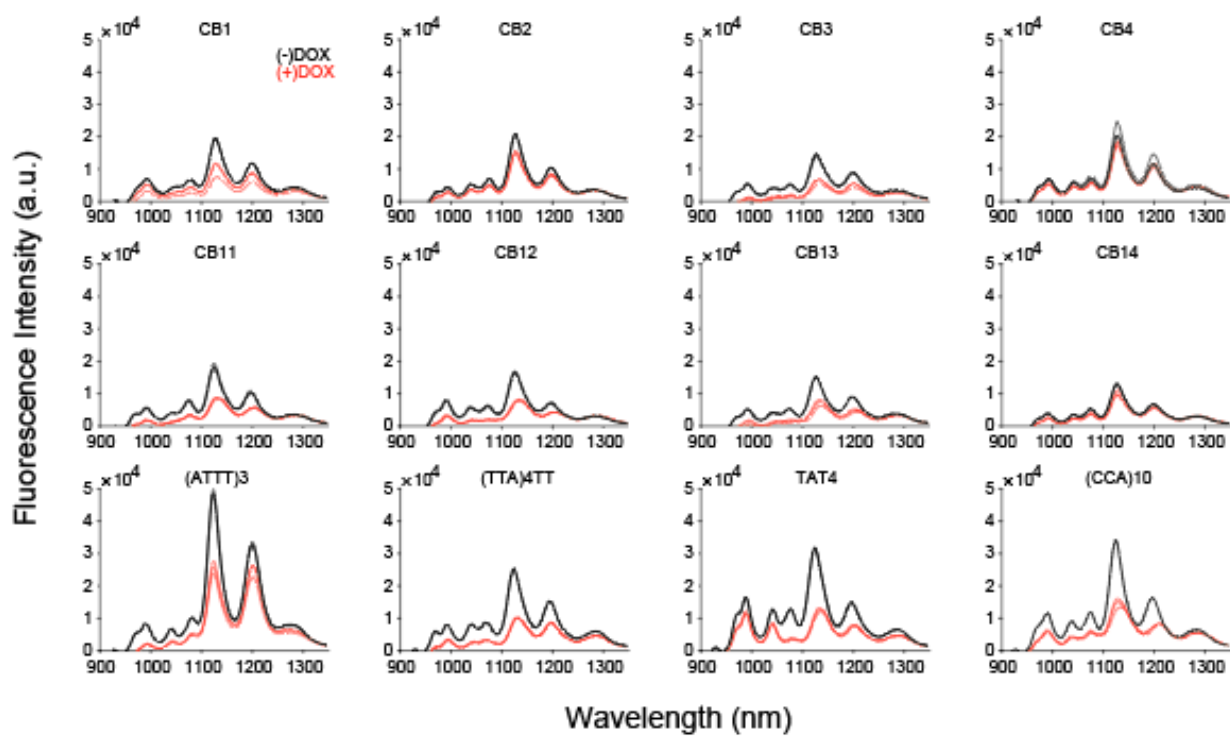

**Figure S4.** Fluorescence emission spectra for 12 different DNA-wrapped SWNTs (10  $\mu\text{g}/\text{mL}$  in 1X PBS) before and after addition of 100  $\mu\text{M}$  doxorubicin. Spectra were collected from 3 technical replicates.

|               | A  | T  | C  | G | %AT      | %CG      | length | A632nm | quench | shift |
|---------------|----|----|----|---|----------|----------|--------|--------|--------|-------|
| <b>CB1</b>    | 1  | 2  | 18 | 5 | 0.115385 | 0.884615 | 26     | 0.2709 | yes    | no    |
| <b>CB2</b>    | 3  | 2  | 17 | 4 | 0.192308 | 0.807692 | 26     | 0.2681 | no     | no    |
| <b>CB3</b>    | 2  | 2  | 20 | 2 | 0.153846 | 0.846154 | 26     | 0.2117 | yes    | no    |
| <b>CB4</b>    | 1  | 0  | 19 | 6 | 0.038462 | 0.961538 | 26     | 0.2954 | no     | no    |
| <b>CB11</b>   | 5  | 4  | 17 | 0 | 0.346154 | 0.653846 | 26     | 0.232  | yes    | yes   |
| <b>CB12</b>   | 0  | 6  | 18 | 2 | 0.230769 | 0.769231 | 26     | 0.2848 | yes    | yes   |
| <b>CB13</b>   | 4  | 4  | 17 | 1 | 0.307692 | 0.692308 | 26     | 0.2242 | yes    | yes   |
| <b>CB14</b>   | 1  | 3  | 19 | 3 | 0.153846 | 0.846154 | 26     | 0.1691 | no     | no    |
| <b>ATTT3</b>  | 3  | 9  | 0  | 0 | 1        | 0        | 12     | 0.3483 | yes    | no    |
| <b>TTA4TT</b> | 4  | 10 | 0  | 0 | 1        | 0        | 14     | 0.3879 | yes    | yes   |
| <b>TAT4</b>   | 4  | 8  | 0  | 0 | 1        | 0        | 12     | 0.4774 | yes    | yes   |
| <b>CCA10</b>  | 10 | 0  | 20 | 0 | 0.333333 | 0.666667 | 30     | 0.4824 | yes    | yes   |

**Table S1.** Properties of 12 different DNA-wrapped SWNTs preparations.

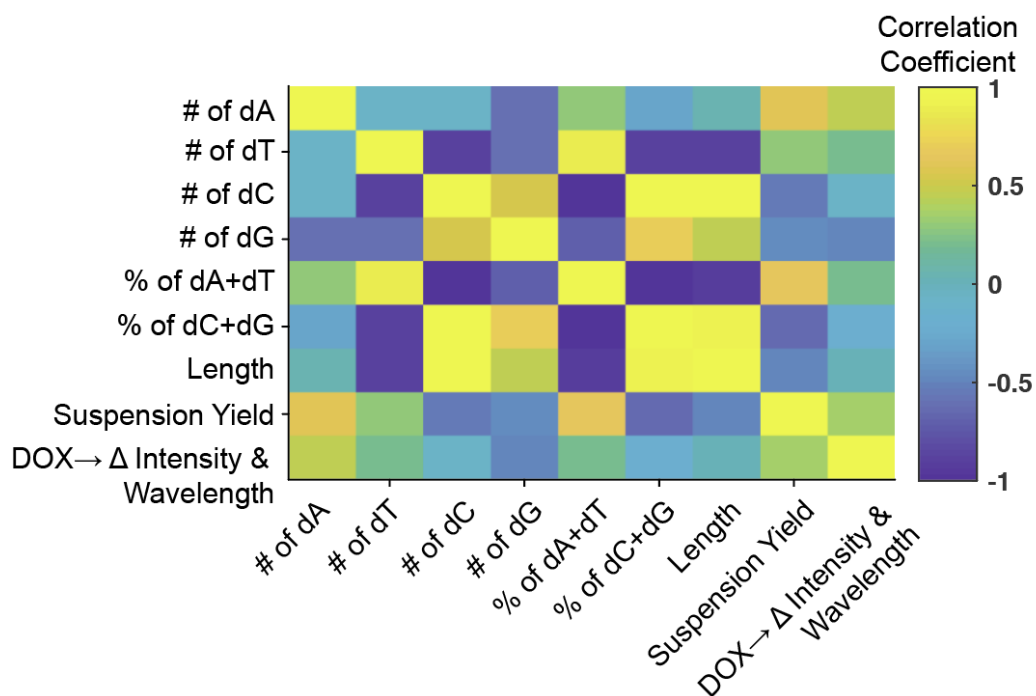

**Figure S5.** Correlation analysis of DNA-SWNT nanosensor properties and impact on doxorubicin response.

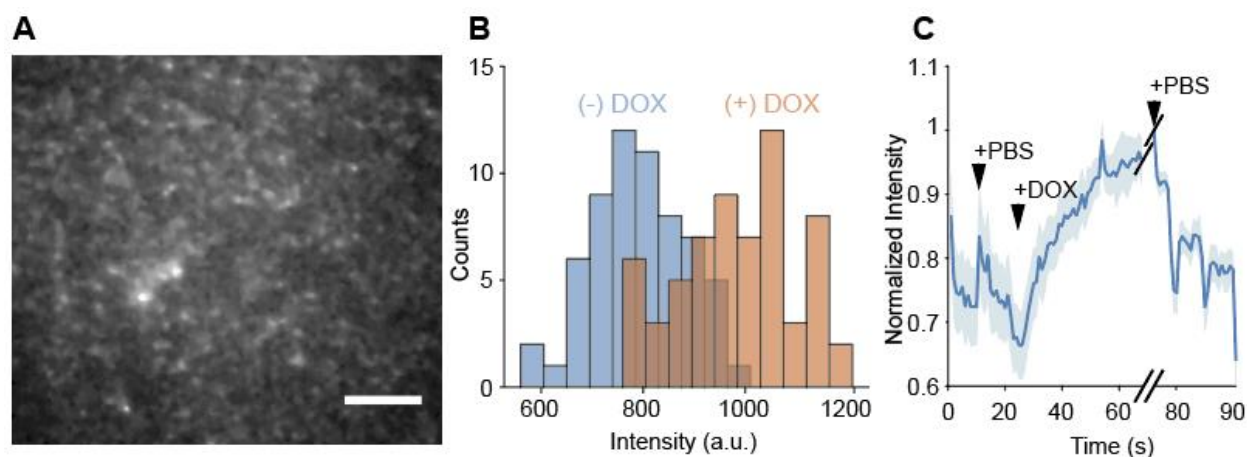

**Figure S6.** (A) Single molecule measurements of CB13-DNA-SWNT nanosensors adsorbed onto a glass slide. (B) Histogram showing fluorescence intensity of individual nanosensors before and after addition of 100  $\mu\text{M}$  doxorubicin. (C) Washing of 1X PBS induced negligible fluorescence intensity increase, while addition of 100  $\mu\text{M}$  DOX produced a transient increase in fluorescence. Washing away DOX with PBS reduced fluorescence intensity back to initial levels. Diagonal bars in (C) represent a time gap and change in field of view prior to beginning PBS washes. Intensity were collected from between 20-50 single sensors, averaged, and normalized to the peak intensity in time. The shaded region represents the standard deviation between individual SWNTs. Scale bar is 10  $\mu\text{M}$ .

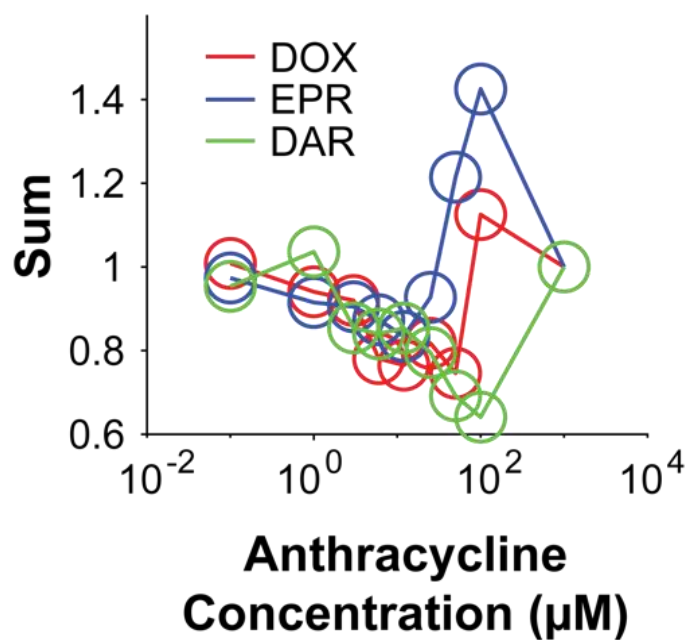

**Figure S7.** Sum of fitting parameters ( $\alpha + \beta$ ) for anthracycline titrations.
